# Supplementary material for: Root Na+ Content Negatively Correlated to Salt Tolerance Determines the Salt Tolerance of Brassica napus L. Inbred Seedlings
Source: MDPI journal article supplement (doi:10.3390/plants11070906), 2022-03-29
Supplement: s1 [file s1]

### Supplementary Materials S1. Absolute and relative values of the *B. napus* growth indexes

| Salt tolerance levels | No. of inbred lines | NaCl levels    | Values         | Fresh weight of shoots (mg/ plant) | Fresh weight of roots (mg/ plant) | Total fresh weight (mg/plant) | Dry weight of shoots (mg/ plant) | Dry weight of roots (mg/ plant) | Total dry weight (mg/plant) | Shoot length (cm/plant) | Root length (cm/plant) | Dry weight of shoots/Fresh weight of shoots | Dry weight of roots/Fresh weight of roots |                 |
|-----------------------|---------------------|----------------|----------------|------------------------------------|-----------------------------------|-------------------------------|----------------------------------|---------------------------------|-----------------------------|-------------------------|------------------------|---------------------------------------------|-------------------------------------------|-----------------|
| HSS (1)               | 557                 | 0              | Absolute value | 31.49 ± 1.08                       | 13.25 ± 1.15                      | 44.74 ± 2.21                  | 3.02 ± 0.07                      | 0.74 ± 0.11                     | 3.76 ± 0.07                 | 2.73 ± 0.72             | 11.96 ± 3.17           | 0.10 ± 4.83E-03                             | 0.06 ± 3.30E-03                           |                 |
|                       |                     |                | Relative value | 1.00                               | 1.00                              | 1.00                          | 1.00                             | 1.00                            | 1.00                        | 1.00                    | 1.00                   | 1.00                                        | 1.00                                      |                 |
|                       |                     | 50             | Absolute value | 25.28 ± 1.28                       | 11.91 ± 1.55                      | 37.19 ± 2.28                  | 3.01 ± 0.05                      | 0.68 ± 0.10                     | 3.69 ± 0.14                 | 1.96 ± 0.53             | 10.40 ± 2.73           | 0.12 ± 4.33E-03                             | 0.06 ± 1.68E-03                           |                 |
|                       |                     |                | Relative value | 0.80                               | 0.90                              | 0.83                          | 1.00                             | 0.93                            | 0.98                        | 0.72                    | 0.87                   | 1.24                                        | 1.03                                      |                 |
|                       |                     | 100            | Absolute value | 18.99 ± 1.21                       | 9.06 ± 1.29                       | 28.05 ± 0.81                  | 2.77 ± 0.17                      | 0.57 ± 0.10                     | 3.34 ± 0.11                 | 1.42 ± 0.39             | 8.06 ± 1.84            | 0.15 ± 1.42E-03                             | 0.06 ± 3.10E-03                           |                 |
|                       |                     |                | Relative value | 0.60                               | 0.68                              | 0.63                          | 0.92                             | 0.77                            | 0.89                        | 0.52                    | 0.67                   | 1.52                                        | 1.13                                      |                 |
|                       |                     | 150            | Absolute value | 11.07 ± 0.44                       | 6.22 ± 1.23                       | 17.29 ± 0.82                  | 1.68 ± 0.13                      | 0.43 ± 0.04                     | 2.10 ± 0.12                 | 1.19 ± 0.36             | 4.76 ± 1.63            | 0.15 ± 0.01                                 | 0.07 ± 0.01                               |                 |
|                       |                     |                | Relative value | 0.35                               | 0.47                              | 0.39                          | 0.56                             | 0.58                            | 0.56                        | 0.44                    | 0.40                   | 1.58                                        | 1.25                                      |                 |
|                       |                     | 200            | Absolute value | /                                  | 4.69 ± 0.05                       | /                             | /                                | 0.33 ± 0.02                     | /                           | /                       | 3.35 ± 1.08            | /                                           | 0.07 ± 3.06E-03                           |                 |
|                       |                     |                | Relative value | /                                  | 0.35                              | /                             | /                                | 0.45                            | /                           | /                       | 0.28                   | /                                           | 1.28                                      |                 |
|                       |                     | 611            | 0              | Absolute value                     | 24.91 ± 2.48                      | 13.10 ± 0.39                  | 38.01 ± 2.87                     | 2.25 ± 0.12                     | 0.84 ± 0.08                 | 3.09 ± 0.20             | 3.84 ± 0.63            | 8.89 ± 2.31                                 | 0.09 ± 4.52E-03                           | 0.06 ± 4.77E-03 |
|                       |                     |                |                | Relative value                     | 1.00                              | 1.00                          | 1.00                             | 1.00                            | 1.00                        | 1.00                    | 1.00                   | 1.00                                        | 1.00                                      | 1.00            |
|                       |                     |                | 50             | Absolute value                     | 18.74 ± 2.89                      | 9.15 ± 0.60                   | 27.89 ± 2.84                     | 2.01 ± 0.16                     | 0.63 ± 0.05                 | 2.63 ± 0.12             | 2.57 ± 0.52            | 7.20 ± 2.81                                 | 0.11 ± 0.01                               | 0.07 ± 9.30E-04 |
|                       |                     |                |                | Relative value                     | 0.75                              | 0.70                          | 0.73                             | 0.89                            | 0.74                        | 0.85                    | 0.67                   | 0.81                                        | 1.20                                      | 1.06            |
|                       | 100                 |                | Absolute value | 13.41 ± 2.10                       | 8.21 ± 1.58                       | 21.62 ± 2.32                  | 1.81 ± 0.23                      | 0.57 ± 0.07                     | 2.38 ± 0.17                 | 2.06 ± 0.43             | 7.11 ± 2.21            | 0.14 ± 0.03                                 | 0.07 ± 0.01                               |                 |
|                       |                     |                | Relative value | 0.54                               | 0.63                              | 0.57                          | 0.81                             | 0.67                            | 0.77                        | 0.54                    | 0.80                   | 1.52                                        | 1.09                                      |                 |
|                       | 150                 |                | Absolute value | 9.35 ± 0.48                        | 5.40 ± 0.51                       | 14.74 ± 0.98                  | 1.50 ± 0.26                      | 0.42 ± 0.08                     | 1.92 ± 0.34                 | 1.31 ± 0.29             | 4.96 ± 1.71            | 0.16 ± 0.02                                 | 0.08 ± 0.01                               |                 |
|                       |                     |                | Relative value | 0.38                               | 0.41                              | 0.39                          | 0.67                             | 0.49                            | 0.62                        | 0.34                    | 0.56                   | 1.77                                        | 1.19                                      |                 |
|                       | 200                 |                | Absolute value | 9.34 ± 1.40                        | 3.96 ± 0.84                       | 13.31 ± 1.88                  | 1.57 ± 0.20                      | 0.34 ± 0.11                     | 1.92 ± 0.24                 | 1.24 ± 0.14             | 3.59 ± 1.07            | 0.17 ± 0.05                                 | 0.09 ± 0.01                               |                 |
|                       |                     |                | Relative value | 0.38                               | 0.30                              | 0.35                          | 0.70                             | 0.41                            | 0.62                        | 0.32                    | 0.40                   | 1.91                                        | 1.33                                      |                 |
|                       | 668                 |                | 0              | Absolute value                     | 30.03 ± 0.58                      | 13.71 ± 1.01                  | 43.74 ± 1.54                     | 3.19 ± 0.07                     | 0.77 ± 0.08                 | 3.95 ± 0.08             | 2.83 ± 0.53            | 8.66 ± 1.99                                 | 0.11 ± 2.09E-03                           | 0.06 ± 3.23E-03 |
|                       |                     |                |                | Relative value                     | 1.00                              | 1.00                          | 1.00                             | 1.00                            | 1.00                        | 1.00                    | 1.00                   | 1.00                                        | 1.00                                      | 1.00            |
|                       |                     |                | 50             | Absolute value                     | 22.60 ± 0.93                      | 13.92 ± 0.77                  | 36.52 ± 0.93                     | 2.83 ± 0.14                     | 0.79 ± 0.10                 | 3.61 ± 0.22             | 1.89 ± 0.48            | 7.82 ± 3.69                                 | 0.13 ± 3.74E-03                           | 0.06 ± 0.01     |
|                       |                     |                |                | Relative value                     | 0.75                              | 1.02                          | 0.83                             | 0.89                            | 1.03                        | 0.91                    | 0.67                   | 0.90                                        | 1.18                                      | 1.02            |
|                       |                     |                | 100            | Absolute value                     | 21.47 ± 1.71                      | 9.66 ± 1.48                   | 31.13 ± 3.05                     | 3.03 ± 0.29                     | 0.63 ± 0.07                 | 3.66 ± 0.34             | 1.53 ± 0.36            | 7.00 ± 2.26                                 | 0.14 ± 4.43E-03                           | 0.07 ± 2.80E-03 |
|                       |                     |                |                | Relative value                     | 0.72                              | 0.70                          | 0.71                             | 0.95                            | 0.83                        | 0.93                    | 0.54                   | 0.81                                        | 1.33                                      | 1.18            |
|                       |                     | 150            | Absolute value | 14.54 ± 2.22                       | 6.75 ± 0.19                       | 21.30 ± 2.06                  | 2.20 ± 0.16                      | 0.45 ± 0.03                     | 2.65 ± 0.14                 | 1.14 ± 0.22             | 5.16 ± 1.73            | 0.15 ± 0.01                                 | 0.07 ± 0.01                               |                 |
|                       |                     |                | Relative value | 0.48                               | 0.49                              | 0.49                          | 0.69                             | 0.59                            | 0.67                        | 0.40                    | 0.60                   | 1.44                                        | 1.20                                      |                 |
|                       |                     | 200            | Absolute value | 12.87 ± 0.83                       | 4.93 ± 0.52                       | 17.79 ± 0.43                  | 1.69 ± 0.15                      | 0.31 ± 0.07                     | 2.00 ± 0.10                 | 0.86 ± 0.09             | 2.31 ± 0.80            | 0.13 ± 0.01                                 | 0.06 ± 0.01                               |                 |
|                       |                     |                | Relative value | 0.43                               | 0.36                              | 0.41                          | 0.53                             | 0.40                            | 0.51                        | 0.31                    | 0.27                   | 1.24                                        | 1.13                                      |                 |
| 703                   | 0                   | Absolute value | 30.61 ± 1.24   | 15.96 ± 0.50                       | 46.58 ± 1.00                      | 3.20 ± 0.09                   | 0.92 ± 0.05                      | 4.12 ± 0.09                     | 2.97 ± 0.52                 | 10.47 ± 2.66            | 0.10 ± 1.72E-03        | 0.06 ± 3.68E-03                             |                                           |                 |
|                       |                     | Relative value | 1.00           | 1.00                               | 1.00                              | 1.00                          | 1.00                             | 1.00                            | 1.00                        | 1.00                    | 1.00                   | 1.00                                        |                                           |                 |
|                       | 50                  | Absolute value | 23.01 ± 1.59   | 11.81 ± 0.64                       | 34.83 ± 1.12                      | 2.77 ± 0.20                   | 0.66 ± 0.05                      | 3.43 ± 0.15                     | 2.09 ± 0.53                 | 9.05 ± 3.48             | 0.12 ± 3.71E-03        | 0.06 ± 1.93E-03                             |                                           |                 |
|                       |                     | Relative value | 0.75           | 0.74                               | 0.75                              | 0.87                          | 0.72                             | 0.83                            | 0.71                        | 0.86                    | 1.15                   | 0.97                                        |                                           |                 |
|                       | 100                 | Absolute value | 22.34 ± 3.72   | 9.19 ± 1.21                        | 31.53 ± 4.84                      | 3.04 ± 0.43                   | 0.60 ± 0.06                      | 3.64 ± 0.46                     | 1.56 ± 0.52                 | 5.64 ± 3.00             | 0.14 ± 4.41E-03        | 0.07 ± 3.55E-03                             |                                           |                 |
|                       |                     | Relative value | 0.73           | 0.58                               | 0.68                              | 0.95                          | 0.66                             | 0.88                            | 0.52                        | 0.54                    | 1.30                   | 1.15                                        |                                           |                 |
|                       | 150                 | Absolute value | 15.71 ± 3.67   | 4.65 ± 0.24                        | 20.36 ± 3.76                      | 2.87 ± 0.35                   | 0.34 ± 0.01                      | 3.21 ± 0.34                     | 1.17 ± 0.19                 | 3.93 ± 1.63             | 0.19 ± 0.03            | 0.07 ± 3.87E-03                             |                                           |                 |
|                       |                     | Relative value | 0.51           | 0.29                               | 0.44                              | 0.90                          | 0.37                             | 0.78                            | 0.40                        | 0.38                    | 1.79                   | 1.27                                        |                                           |                 |
|                       | 200                 | Absolute value | 11.05 ± 1.85   | 4.67 ± 0.25                        | 15.72 ± 1.74                      | 2.17 ± 0.22                   | 0.28 ± 0.02                      | 2.45 ± 0.20                     | 0.91 ± 0.20                 | 2.56 ± 1.09             | 0.20 ± 0.02            | 0.06 ± 4.01E-03                             |                                           |                 |
|                       |                     | Relative value | 0.36           | 0.29                               | 0.34                              | 0.68                          | 0.31                             | 0.59                            | 0.31                        | 0.24                    | 1.89                   | 1.05                                        |                                           |                 |
| Average               | 0                   | Absolute value | 29.26 ± 2.96   | 14.01 ± 1.33                       | 43.27 ± 3.69                      | 2.91 ± 0.45                   | 0.82 ± 0.08                      | 3.73 ± 0.45                     | 3.09 ± 0.51                 | 9.99 ± 1.53             | 0.10 ± 0.01            | 0.06 ± 4.06E-03                             |                                           |                 |
|                       |                     | Relative value | 1.00           | 1.00                               | 1.00                              | 1.00                          | 1.00                             | 1.00                            | 1.00                        | 1.00                    | 1.00                   | 1.00                                        |                                           |                 |

## Supplementary Materials S1 continued

|        |                |                |                |                |              |              |              |             |             |                 |                 |                 |                 |                 |
|--------|----------------|----------------|----------------|----------------|--------------|--------------|--------------|-------------|-------------|-----------------|-----------------|-----------------|-----------------|-----------------|
| SS (2) | 40             | 0              | Absolute value | 22.41 ± 2.72   | 11.70 ± 1.96 | 34.11 ± 4.26 | 2.65 ± 0.44  | 0.69 ± 0.07 | 3.34 ± 0.49 | 2.13 ± 0.30     | 8.62 ± 1.42     | 0.12 ± 0.01     | 0.06 ± 0.01     |                 |
|        |                |                | Relative value | 0.76           | 0.84         | 0.79         | 0.91         | 0.85        | 0.90        | 0.69            | 0.86            | 1.19            | 1.02            |                 |
|        |                | 100            | Absolute value | 19.05 ± 4.02   | 9.03 ± 0.61  | 28.08 ± 4.58 | 2.66 ± 0.58  | 0.59 ± 0.03 | 3.26 ± 0.60 | 1.64 ± 0.28     | 6.95 ± 1.00     | 0.14 ± 4.35E-03 | 0.07 ± 2.86E-03 |                 |
|        |                |                | Relative value | 0.65           | 0.65         | 0.65         | 0.91         | 0.73        | 0.87        | 0.53            | 0.71            | 1.42            | 1.14            |                 |
|        |                | 150            | Absolute value | 12.67 ± 2.96   | 5.75 ± 0.93  | 18.42 ± 2.99 | 2.06 ± 0.61  | 0.41 ± 0.05 | 2.47 ± 0.58 | 1.20 ± 0.07     | 4.70 ± 0.54     | 0.16 ± 0.02     | 0.07 ± 4.20E-03 |                 |
|        |                |                | Relative value | 0.43           | 0.42         | 0.42         | 0.70         | 0.51        | 0.66        | 0.39            | 0.48            | 1.64            | 1.23            |                 |
|        | 200            | Absolute value | 11.09 ± 1.76   | 4.56 ± 0.42    | 15.61 ± 2.25 | 1.81 ± 0.31  | 0.32 ± 0.03  | 2.12 ± 0.29 | 1.01 ± 0.17 | 2.95 ± 0.61     | 0.17 ± 0.03     | 0.07 ± 0.01     |                 |                 |
|        |                | Relative value | 0.39           | 0.33           | 0.36         | 0.64         | 0.39         | 0.57        | 0.31        | 0.30            | 1.68            | 1.20            |                 |                 |
|        | 74             | 0              | Absolute value | 30.53 ± 3.53   | 14.54 ± 1.66 | 45.07 ± 5.15 | 3.10 ± 0.18  | 0.83 ± 0.05 | 3.93 ± 0.14 | 3.27 ± 0.29     | 10.16 ± 1.40    | 0.10 ± 0.01     | 0.06 ± 0.01     |                 |
|        |                |                | Relative value | 1.00           | 1.00         | 1.00         | 1.00         | 1.00        | 1.00        | 1.00            | 1.00            | 1.00            | 1.00            |                 |
|        |                |                | 50             | Absolute value | 28.29 ± 1.39 | 13.42 ± 0.41 | 41.71 ± 0.97 | 3.16 ± 0.18 | 0.76 ± 0.03 | 3.92 ± 0.15     | 2.67 ± 0.43     | 8.64 ± 2.29     | 0.11 ± 9.98E-04 | 0.06 ± 1.47E-03 |
|        |                |                |                | Relative value | 0.93         | 0.92         | 0.93         | 1.02        | 0.91        | 1.00            | 0.82            | 0.85            | 1.10            | 0.97            |
|        |                |                | 100            | Absolute value | 19.88 ± 0.63 | 11.15 ± 0.38 | 31.03 ± 1.00 | 2.77 ± 0.11 | 0.71 ± 0.04 | 3.48 ± 0.12     | 2.28 ± 0.25     | 7.10 ± 1.99     | 0.14 ± 0.01     | 0.06 ± 1.26E-03 |
|        |                |                |                | Relative value | 0.65         | 0.77         | 0.69         | 0.89        | 0.86        | 0.89            | 0.70            | 0.70            | 1.37            | 1.10            |
|        |                | 150            | Absolute value | 15.23 ± 2.97   | 9.79 ± 0.54  | 25.02 ± 3.27 | 2.63 ± 0.13  | 0.63 ± 0.05 | 3.26 ± 0.09 | 2.00 ± 0.34     | 4.98 ± 1.45     | 0.18 ± 0.02     | 0.06 ± 0.01     |                 |
|        |                |                | Relative value | 0.50           | 0.67         | 0.56         | 0.85         | 0.76        | 0.83        | 0.61            | 0.49            | 1.72            | 1.12            |                 |
|        |                | 200            | Absolute value | 12.70 ± 0.41   | 5.71 ± 0.77  | 18.41 ± 0.83 | 2.18 ± 0.06  | 0.39 ± 0.01 | 2.57 ± 0.07 | 1.72 ± 0.14     | 3.82 ± 0.80     | 0.17 ± 8.93E-04 | 0.07 ± 0.01     |                 |
|        |                |                | Relative value | 0.42           | 0.39         | 0.41         | 0.71         | 0.46        | 0.65        | 0.53            | 0.38            | 1.69            | 1.18            |                 |
|        |                | 50             | Absolute value | 31.55 ± 1.82   | 19.45 ± 1.07 | 51.00 ± 2.24 | 3.44 ± 0.13  | 1.03 ± 0.10 | 4.47 ± 0.22 | 3.14 ± 0.24     | 8.68 ± 1.93     | 0.11 ± 2.92E-03 | 0.05 ± 0.01     |                 |
|        |                |                | Relative value | 1.00           | 1.00         | 1.00         | 1.00         | 1.00        | 1.00        | 1.00            | 1.00            | 1.00            | 1.00            |                 |
| 100    |                |                | Absolute value | 29.29 ± 1.81   | 14.52 ± 2.21 | 43.81 ± 3.31 | 3.19 ± 0.21  | 0.86 ± 0.11 | 4.05 ± 0.28 | 2.83 ± 0.38     | 6.50 ± 1.46     | 0.11 ± 1.12E-03 | 0.06 ± 1.60E-03 |                 |
|        |                |                | Relative value | 0.93           | 0.75         | 0.86         | 0.93         | 0.83        | 0.91        | 0.90            | 0.75            | 1.00            | 1.12            |                 |
| 150    |                |                | Absolute value | 20.64 ± 1.38   | 8.65 ± 0.24  | 29.29 ± 1.41 | 2.56 ± 0.12  | 0.53 ± 0.03 | 3.08 ± 0.15 | 2.64 ± 0.38     | 6.14 ± 1.38     | 0.12 ± 3.06E-03 | 0.06 ± 3.94E-03 |                 |
|        |                |                | Relative value | 0.65           | 0.44         | 0.57         | 0.74         | 0.51        | 0.69        | 0.84            | 0.71            | 1.14            | 1.15            |                 |
| 100    |                | Absolute value | 15.58 ± 3.11   | 7.97 ± 0.29    | 23.55 ± 3.39 | 2.27 ± 0.32  | 0.53 ± 0.02  | 2.80 ± 0.32 | 1.99 ± 0.30 | 5.41 ± 0.76     | 0.15 ± 0.01     | 0.07 ± 3.10E-03 |                 |                 |
|        |                | Relative value | 0.49           | 0.41           | 0.46         | 0.66         | 0.51         | 0.63        | 0.64        | 0.62            | 1.35            | 1.25            |                 |                 |
|        |                | 150            | Absolute value | 15.04 ± 1.32   | 5.68 ± 0.94  | 20.72 ± 1.23 | 2.29 ± 0.24  | 0.29 ± 0.02 | 2.58 ± 0.23 | 1.61 ± 0.14     | 3.66 ± 0.67     | 0.15 ± 0.01     | 0.05 ± 0.01     |                 |
|        |                |                | Relative value | 0.48           | 0.29         | 0.41         | 0.67         | 0.28        | 0.58        | 0.51            | 0.42            | 1.39            | 0.97            |                 |
|        | 200            | Absolute value | 35.63 ± 1.49   | 13.13 ± 0.90   | 48.76 ± 2.39 | 3.70 ± 0.30  | 0.72 ± 0.08  | 4.42 ± 0.37 | 3.77 ± 0.63 | 10.03 ± 2.19    | 0.10 ± 0.01     | 0.05 ± 2.32E-03 |                 |                 |
|        |                | Relative value | 1.00           | 1.00           | 1.00         | 1.00         | 1.00         | 1.00        | 1.00        | 1.00            | 1.00            | 1.00            |                 |                 |
| 50     |                | Absolute value | 28.48 ± 0.39   | 11.80 ± 1.41   | 40.28 ± 1.43 | 3.54 ± 0.07  | 0.67 ± 0.05  | 4.21 ± 0.08 | 2.75 ± 0.51 | 9.43 ± 1.64     | 0.12 ± 8.86E-04 | 0.06 ± 2.17E-03 |                 |                 |
|        |                | Relative value | 0.80           | 0.90           | 0.83         | 0.96         | 0.93         | 0.95        | 0.73        | 0.94            | 1.20            | 1.04            |                 |                 |
| 100    |                | Absolute value | 25.27 ± 1.49   | 8.91 ± 0.97    | 34.18 ± 2.17 | 3.41 ± 0.06  | 0.55 ± 0.05  | 3.95 ± 0.10 | 2.01 ± 0.33 | 6.52 ± 2.13     | 0.14 ± 0.01     | 0.06 ± 3.67E-03 |                 |                 |
|        |                | Relative value | 0.71           | 0.68           | 0.70         | 0.92         | 0.76         | 0.90        | 0.53        | 0.65            | 1.30            | 1.13            |                 |                 |
| 150    | Absolute value | 18.24 ± 3.28   | 5.45 ± 1.35    | 23.69 ± 4.58   | 3.09 ± 0.59  | 0.42 ± 0.17  | 3.51 ± 0.75  | 1.57 ± 0.22 | 5.54 ± 1.31 | 0.17 ± 2.45E-03 | 0.07 ± 0.01     |                 |                 |                 |
|        | Relative value | 0.51           | 0.42           | 0.49           | 0.83         | 0.59         | 0.79         | 0.42        | 0.55        | 1.63            | 1.37            |                 |                 |                 |
|        | 200            | Absolute value | 17.29 ± 1.99   | 4.97 ± 0.67    | 22.26 ± 2.05 | 2.94 ± 0.42  | 0.31 ± 0.07  | 3.25 ± 0.41 | 1.40 ± 0.17 | 3.44 ± 0.98     | 0.17 ± 4.43E-03 | 0.06 ± 4.94E-03 |                 |                 |
|        |                | Relative value | 0.49           | 0.38           | 0.46         | 0.79         | 0.43         | 0.74        | 0.37        | 0.34            | 1.63            | 1.14            |                 |                 |
|        | 277            | 0              | Absolute value | 34.89 ± 2.44   | 15.26 ± 1.23 | 50.15 ± 3.65 | 3.23 ± 0.34  | 0.87 ± 0.11 | 4.11 ± 0.43 | 3.86 ± 0.34     | 9.96 ± 2.85     | 0.09 ± 3.25E-03 | 0.06 ± 3.93E-03 |                 |
|        |                |                | Relative value | 1.00           | 1.00         | 1.00         | 1.00         | 1.00        | 1.00        | 1.00            | 1.00            | 1.00            | 1.00            |                 |
| 50     |                | Absolute value | 28.96 ± 2.94   | 15.42 ± 1.87   | 44.39 ± 2.27 | 3.85 ± 0.23  | 0.92 ± 0.10  | 4.77 ± 0.21 | 2.63 ± 0.32 | 7.59 ± 1.37     | 0.13 ± 0.01     | 0.06 ± 7.83E-04 |                 |                 |
|        |                | Relative value | 0.83           | 1.01           | 0.89         | 1.19         | 1.06         | 1.16        | 0.68        | 0.76            | 1.44            | 1.05            |                 |                 |
| 100    |                | Absolute value | 22.33 ± 2.14   | 11.02 ± 0.27   | 33.35 ± 2.41 | 3.05 ± 0.38  | 0.74 ± 0.04  | 3.79 ± 0.38 | 2.03 ± 0.38 | 5.17 ± 1.14     | 0.14 ± 4.13E-03 | 0.07 ± 4.10E-03 |                 |                 |
|        |                | Relative value | 0.64           | 0.72           | 0.67         | 0.94         | 0.84         | 0.92        | 0.52        | 0.52            | 1.47            | 1.17            |                 |                 |
| 150    | Absolute value | 15.85 ± 0.90   | 7.45 ± 1.03    | 23.30 ± 0.63   | 2.78 ± 0.13  | 0.54 ± 0.05  | 3.32 ± 0.15  | 1.68 ± 0.23 | 4.24 ± 1.05 | 0.18 ± 2.64E-03 | 0.07 ± 0.01     |                 |                 |                 |
|        | Relative value | 0.45           | 0.49           | 0.46           | 0.86         | 0.62         | 0.81         | 0.44        | 0.43        | 1.90            | 1.29            |                 |                 |                 |

Supplementary Materials S1 continued

|         |         |                |                |                |              |              |              |             |             |             |                 |                 |                 |                 |
|---------|---------|----------------|----------------|----------------|--------------|--------------|--------------|-------------|-------------|-------------|-----------------|-----------------|-----------------|-----------------|
| Average | 200     | Absolute value | 20.28 ± 3.19   | 6.26 ± 0.48    | 26.54 ± 3.65 | 3.10 ± 0.53  | 0.41 ± 0.04  | 3.51 ± 0.57 | 1.58 ± 0.13 | 2.64 ± 0.47 | 0.15 ± 3.66E-03 | 0.07 ± 2.36E-03 |                 |                 |
|         |         | Relative value | 0.58           | 0.41           | 0.53         | 0.96         | 0.47         | 0.85        | 0.41        | 0.27        | 1.65            | 1.15            |                 |                 |
|         | 0       | Absolute value | 33.15 ± 2.49   | 15.60 ± 2.72   | 48.75 ± 2.62 | 3.37 ± 0.26  | 0.86 ± 0.13  | 4.23 ± 0.26 | 3.51 ± 0.36 | 9.71 ± 0.69 | 0.10 ± 0.01     | 0.06 ± 2.39E-03 |                 |                 |
|         |         | Relative value | 1.00           | 1.00           | 1.00         | 1.00         | 1.00         | 1.00        | 1.00        | 1.00        | 1.00            | 1.00            |                 |                 |
|         | 50      | Absolute value | 28.76 ± 0.45   | 13.79 ± 1.56   | 42.55 ± 1.90 | 3.44 ± 0.32  | 0.80 ± 0.11  | 4.24 ± 0.37 | 2.72 ± 0.09 | 8.04 ± 1.27 | 0.12 ± 0.01     | 0.06 ± 1.71E-03 |                 |                 |
|         |         | Relative value | 0.87           | 0.89           | 0.87         | 1.02         | 0.93         | 1.00        | 0.78        | 0.83        | 1.18            | 1.05            |                 |                 |
|         | 100     | Absolute value | 22.03 ± 2.39   | 9.93 ± 1.34    | 31.96 ± 2.22 | 2.95 ± 0.37  | 0.63 ± 0.11  | 3.58 ± 0.38 | 2.24 ± 0.30 | 6.23 ± 0.81 | 0.13 ± 0.01     | 0.06 ± 2.71E-03 |                 |                 |
|         |         | Relative value | 0.66           | 0.65           | 0.66         | 0.88         | 0.74         | 0.85        | 0.65        | 0.64        | 1.32            | 1.14            |                 |                 |
|         | 150     | Absolute value | 16.23 ± 1.37   | 7.67 ± 1.79    | 23.89 ± 0.77 | 2.69 ± 0.34  | 0.53 ± 0.09  | 3.22 ± 0.30 | 1.81 ± 0.22 | 5.04 ± 0.58 | 0.17 ± 0.01     | 0.07 ± 0.01     |                 |                 |
|         |         | Relative value | 0.49           | 0.50           | 0.49         | 0.80         | 0.62         | 0.76        | 0.52        | 0.52        | 1.65            | 1.26            |                 |                 |
|         | 200     | Absolute value | 16.33 ± 3.23   | 5.66 ± 0.53    | 21.98 ± 3.43 | 2.63 ± 0.46  | 0.35 ± 0.06  | 2.98 ± 0.48 | 1.58 ± 0.13 | 3.39 ± 0.52 | 0.16 ± 0.01     | 0.06 ± 0.01     |                 |                 |
|         |         | Relative value | 0.49           | 0.37           | 0.45         | 0.78         | 0.41         | 0.71        | 0.46        | 0.35        | 1.59            | 1.11            |                 |                 |
|         | MST (3) | 39             | 0              | Absolute value | 34.86 ± 1.57 | 19.80 ± 1.06 | 54.66 ± 1.88 | 3.95 ± 0.17 | 1.16 ± 0.09 | 5.11 ± 0.14 | 1.63 ± 0.13     | 14.35 ± 1.43    | 0.11 ± 2.21E-03 | 0.06 ± 1.61E-03 |
|         |         |                |                | Relative value | 1.00         | 1.00         | 1.00         | 1.00        | 1.00        | 1.00        | 1.00            | 1.00            | 1.00            | 1.00            |
|         |         |                | 50             | Absolute value | 35.92 ± 2.05 | 14.09 ± 2.34 | 50.01 ± 3.48 | 3.77 ± 0.20 | 0.89 ± 0.14 | 4.66 ± 0.29 | 1.63 ± 0.20     | 10.01 ± 1.47    | 0.11 ± 1.75E-03 | 0.06 ± 9.76E-04 |
|         |         |                |                | Relative value | 1.03         | 0.71         | 0.91         | 0.95        | 0.77        | 0.91        | 1.00            | 0.70            | 0.93            | 1.08            |
| 100     |         |                | Absolute value | 34.93 ± 2.55   | 8.99 ± 0.36  | 43.92 ± 2.44 | 3.67 ± 0.13  | 0.59 ± 0.07 | 4.27 ± 0.12 | 1.53 ± 0.16 | 8.65 ± 1.24     | 0.11 ± 4.26E-03 | 0.07 ± 4.65E-03 |                 |
|         |         |                | Relative value | 1.00           | 0.45         | 0.80         | 0.93         | 0.51        | 0.83        | 0.93        | 0.60            | 0.93            | 1.13            |                 |
| 150     |         |                | Absolute value | 24.46 ± 3.26   | 9.67 ± 0.35  | 34.13 ± 3.06 | 3.49 ± 0.35  | 0.64 ± 0.01 | 4.13 ± 0.35 | 1.63 ± 0.18 | 5.17 ± 0.98     | 0.14 ± 0.01     | 0.07 ± 3.23E-03 |                 |
|         |         |                | Relative value | 0.70           | 0.49         | 0.62         | 0.88         | 0.55        | 0.81        | 1.00        | 0.36            | 1.26            | 1.14            |                 |
| 200     |         |                | Absolute value | 21.76 ± 2.93   | 4.84 ± 0.71  | 26.61 ± 3.38 | 3.03 ± 0.13  | 0.37 ± 0.11 | 3.40 ± 0.15 | 1.39 ± 0.12 | 4.15 ± 0.61     | 0.14 ± 0.01     | 0.08 ± 0.01     |                 |
|         |         |                | Relative value | 0.62           | 0.24         | 0.49         | 0.77         | 0.32        | 0.66        | 0.85        | 0.29            | 1.24            | 1.29            |                 |
| 319     |         | 0              | Absolute value | 41.16 ± 1.57   | 19.29 ± 1.30 | 60.45 ± 2.29 | 4.23 ± 0.34  | 1.05 ± 0.12 | 5.28 ± 0.46 | 3.03 ± 0.24 | 10.10 ± 1.38    | 0.10 ± 0.01     | 0.05 ± 3.71E-03 |                 |
|         |         |                | Relative value | 1.00           | 1.00         | 1.00         | 1.00         | 1.00        | 1.00        | 1.00        | 1.00            | 1.00            | 1.00            |                 |
|         |         | 50             | Absolute value | 40.11 ± 2.47   | 14.81 ± 0.69 | 54.93 ± 3.10 | 3.81 ± 0.12  | 0.86 ± 0.08 | 4.67 ± 0.20 | 2.90 ± 0.26 | 8.42 ± 0.93     | 0.10 ± 3.40E-03 | 0.06 ± 2.92E-03 |                 |
|         |         |                | Relative value | 0.97           | 0.77         | 0.91         | 0.90         | 0.81        | 0.88        | 0.96        | 0.83            | 0.93            | 1.06            |                 |
|         |         | 100            | Absolute value | 29.49 ± 0.79   | 8.98 ± 0.98  | 38.47 ± 1.76 | 3.37 ± 0.25  | 0.60 ± 0.06 | 3.98 ± 0.30 | 2.69 ± 0.37 | 6.65 ± 0.57     | 0.11 ± 0.01     | 0.07 ± 1.21E-03 |                 |
|         |         |                | Relative value | 0.72           | 0.47         | 0.64         | 0.80         | 0.57        | 0.75        | 0.89        | 0.66            | 1.11            | 1.24            |                 |
|         |         | 150            | Absolute value | 26.32 ± 1.43   | 8.32 ± 1.26  | 34.64 ± 2.52 | 3.72 ± 0.06  | 0.54 ± 0.11 | 4.26 ± 0.09 | 2.17 ± 0.22 | 5.59 ± 0.81     | 0.14 ± 0.01     | 0.06 ± 4.72E-03 |                 |
|         |         |                | Relative value | 0.64           | 0.43         | 0.57         | 0.88         | 0.51        | 0.81        | 0.71        | 0.55            | 1.38            | 1.19            |                 |
|         |         | 200            | Absolute value | 20.71 ± 2.26   | 4.58 ± 0.18  | 25.29 ± 2.25 | 3.38 ± 0.48  | 0.38 ± 0.07 | 3.76 ± 0.42 | 2.28 ± 0.40 | 4.01 ± 0.65     | 0.16 ± 0.01     | 0.08 ± 0.01     |                 |
|         |         |                | Relative value | 0.50           | 0.24         | 0.42         | 0.80         | 0.36        | 0.71        | 0.75        | 0.40            | 1.58            | 1.54            |                 |
| 388     |         | 0              | Absolute value | 43.55 ± 1.20   | 21.85 ± 2.73 | 65.40 ± 3.86 | 4.14 ± 0.51  | 1.28 ± 0.17 | 5.42 ± 0.51 | 2.69 ± 0.27 | 9.73 ± 1.99     | 0.10 ± 0.01     | 0.06 ± 1.61E-03 |                 |
|         |         |                | Relative value | 1.00           | 1.00         | 1.00         | 1.00         | 1.00        | 1.00        | 1.00        | 1.00            | 1.00            | 1.00            |                 |
|         |         | 50             | Absolute value | 38.24 ± 0.42   | 11.87 ± 0.78 | 50.11 ± 0.78 | 3.92 ± 0.13  | 0.71 ± 0.12 | 4.63 ± 0.13 | 2.38 ± 0.38 | 7.89 ± 1.33     | 0.10 ± 2.45E-03 | 0.06 ± 0.01     |                 |
|         |         |                | Relative value | 0.88           | 0.54         | 0.77         | 0.95         | 0.55        | 0.85        | 0.89        | 0.81            | 1.08            | 1.01            |                 |
|         |         | 100            | Absolute value | 23.40 ± 1.65   | 11.42 ± 0.39 | 34.82 ± 2.04 | 3.47 ± 0.13  | 0.73 ± 0.07 | 4.20 ± 0.20 | 2.29 ± 0.18 | 6.21 ± 1.30     | 0.15 ± 0.01     | 0.06 ± 4.17E-03 |                 |
|         |         |                | Relative value | 0.54           | 0.52         | 0.53         | 0.84         | 0.57        | 0.77        | 0.85        | 0.64            | 1.56            | 1.09            |                 |
|         |         | 150            | Absolute value | 22.80 ± 2.55   | 8.13 ± 1.33  | 30.93 ± 2.70 | 3.37 ± 0.15  | 0.61 ± 0.10 | 3.98 ± 0.10 | 2.19 ± 0.25 | 5.15 ± 0.96     | 0.15 ± 0.01     | 0.07 ± 8.30E-04 |                 |
|         |         |                | Relative value | 0.52           | 0.37         | 0.47         | 0.81         | 0.47        | 0.73        | 0.82        | 0.53            | 1.56            | 1.28            |                 |
|         |         | 200            | Absolute value | 18.28 ± 1.38   | 6.40 ± 0.20  | 24.69 ± 1.27 | 2.81 ± 0.54  | 0.54 ± 0.03 | 3.35 ± 0.54 | 1.65 ± 0.23 | 3.67 ± 0.71     | 0.15 ± 0.02     | 0.08 ± 1.45E-03 |                 |
|         |         |                | Relative value | 0.42           | 0.29         | 0.38         | 0.68         | 0.42        | 0.62        | 0.62        | 0.38            | 1.61            | 1.45            |                 |
| 525     |         | 0              | Absolute value | 31.04 ± 1.02   | 19.46 ± 0.79 | 50.50 ± 1.24 | 2.97 ± 0.09  | 1.34 ± 0.20 | 4.31 ± 0.15 | 2.06 ± 0.30 | 12.18 ± 1.95    | 0.10 ± 3.07E-03 | 0.07 ± 0.01     |                 |
|         |         |                | Relative value | 1.00           | 1.00         | 1.00         | 1.00         | 1.00        | 1.00        | 1.00        | 1.00            | 1.00            | 1.00            |                 |
|         |         | 50             | Absolute value | 30.28 ± 1.07   | 14.13 ± 0.84 | 44.41 ± 1.86 | 3.19 ± 0.18  | 0.84 ± 0.07 | 4.03 ± 0.25 | 1.72 ± 0.18 | 9.34 ± 1.29     | 0.11 ± 3.73E-03 | 0.06 ± 1.66E-03 |                 |
|         |         |                | Relative value | 0.98           | 0.73         | 0.88         | 1.08         | 0.63        | 0.94        | 0.83        | 0.77            | 1.10            | 0.87            |                 |

Supplementary Materials S1 continued

|         |     |                |                |              |              |              |             |             |             |              |                 |                 |                 |
|---------|-----|----------------|----------------|--------------|--------------|--------------|-------------|-------------|-------------|--------------|-----------------|-----------------|-----------------|
| Average | 100 | Absolute value | 23.15 ± 2.80   | 12.26 ± 1.39 | 35.41 ± 4.18 | 3.35 ± 0.25  | 0.69 ± 0.13 | 4.05 ± 0.38 | 1.99 ± 0.30 | 7.29 ± 1.21  | 0.15 ± 0.01     | 0.06 ± 0.01     |                 |
|         |     | Relative value | 0.75           | 0.63         | 0.70         | 1.13         | 0.52        | 0.94        | 0.97        | 0.60         | 1.52            | 0.82            |                 |
|         | 150 | Absolute value | 19.84 ± 0.94   | 10.61 ± 0.32 | 30.45 ± 1.25 | 3.10 ± 0.24  | 0.60 ± 0.08 | 3.70 ± 0.33 | 1.55 ± 0.18 | 6.17 ± 1.26  | 0.16 ± 0.01     | 0.06 ± 0.01     |                 |
|         |     | Relative value | 0.64           | 0.55         | 0.60         | 1.05         | 0.45        | 0.86        | 0.75        | 0.51         | 1.63            | 0.82            |                 |
|         | 200 | Absolute value | /              | 4.38 ± 0.60  | /            | /            | 0.31 ± 0.03 | /           | /           | 4.73 ± 0.92  | /               | 0.07 ± 2.19E-03 |                 |
|         |     | Relative value | /              | 0.22         | /            | /            | 0.23        | /           | /           | 0.39         | /               | 1.02            |                 |
|         | 0   | Absolute value | 37.65 ± 5.73   | 20.10 ± 1.19 | 57.75 ± 6.53 | 3.82 ± 0.58  | 1.21 ± 0.13 | 5.03 ± 0.50 | 2.35 ± 0.63 | 11.59 ± 2.13 | 0.10 ± 0.01     | 0.06 ± 0.01     |                 |
|         |     | Relative value | 1.00           | 1.00         | 1.00         | 1.00         | 1.00        | 1.00        | 1.00        | 1.00         | 1.00            | 1.00            |                 |
|         | 50  | Absolute value | 36.14 ± 4.26   | 13.73 ± 1.28 | 49.86 ± 4.30 | 3.67 ± 0.33  | 0.82 ± 0.08 | 4.50 ± 0.31 | 2.16 ± 0.60 | 8.92 ± 0.94  | 0.10 ± 4.73E-03 | 0.06 ± 2.38E-03 |                 |
|         |     | Relative value | 0.96           | 0.69         | 0.87         | 0.97         | 0.69        | 0.90        | 0.92        | 0.78         | 1.01            | 1.00            |                 |
|         | 100 | Absolute value | 27.74 ± 5.62   | 10.41 ± 1.68 | 38.15 ± 4.16 | 3.47 ± 0.15  | 0.66 ± 0.07 | 4.12 ± 0.13 | 2.13 ± 0.49 | 7.20 ± 1.07  | 0.13 ± 0.02     | 0.06 ± 4.93E-03 |                 |
|         |     | Relative value | 0.75           | 0.52         | 0.67         | 0.92         | 0.54        | 0.83        | 0.91        | 0.62         | 1.28            | 1.07            |                 |
|         | 150 | Absolute value | 23.36 ± 2.75   | 9.18 ± 1.18  | 32.54 ± 2.15 | 3.42 ± 0.26  | 0.60 ± 0.04 | 4.02 ± 0.24 | 1.89 ± 0.34 | 5.52 ± 0.48  | 0.15 ± 0.01     | 0.07 ± 0.01     |                 |
|         |     | Relative value | 0.63           | 0.46         | 0.57         | 0.91         | 0.50        | 0.80        | 0.82        | 0.49         | 1.46            | 1.10            |                 |
|         | 200 | Absolute value | 20.25 ± 1.78   | 5.05 ± 0.92  | 25.53 ± 0.98 | 3.07 ± 0.29  | 0.40 ± 0.10 | 3.50 ± 0.22 | 1.65 ± 0.45 | 4.14 ± 0.44  | 0.15 ± 0.01     | 0.08 ± 0.01     |                 |
|         |     | Relative value | 0.52           | 0.25         | 0.43         | 0.75         | 0.33        | 0.66        | 0.74        | 0.36         | 1.48            | 1.33            |                 |
| ST (4)  | 130 | 0              | Absolute value | 50.45 ± 4.57 | 20.95 ± 3.59 | 71.40 ± 8.03 | 3.84 ± 0.34 | 1.17 ± 0.26 | 5.01 ± 0.60 | 3.01 ± 0.29  | 12.85 ± 1.66    | 0.08 ± 3.36E-03 | 0.06 ± 3.99E-03 |
|         |     |                | Relative value | 1.00         | 1.00         | 1.00         | 1.00        | 1.00        | 1.00        | 1.00         | 1.00            | 1.00            | 1.00            |
|         |     | 50             | Absolute value | 34.30 ± 2.18 | 15.79 ± 1.22 | 50.09 ± 3.26 | 3.62 ± 0.16 | 0.93 ± 0.09 | 4.55 ± 0.23 | 2.36 ± 0.25  | 9.17 ± 1.18     | 0.11 ± 2.27E-03 | 0.06 ± 1.54E-03 |
|         |     |                | Relative value | 0.68         | 0.75         | 0.70         | 0.94        | 0.79        | 0.91        | 0.78         | 0.71            | 1.39            | 1.06            |
|         |     | 100            | Absolute value | 37.63 ± 0.77 | 11.03 ± 1.41 | 48.66 ± 2.07 | 3.87 ± 0.34 | 0.69 ± 0.14 | 4.55 ± 0.46 | 2.05 ± 0.25  | 7.48 ± 1.31     | 0.10 ± 0.01     | 0.06 ± 4.30E-03 |
|         |     |                | Relative value | 0.75         | 0.53         | 0.68         | 1.01        | 0.59        | 0.91        | 0.68         | 0.58            | 1.35            | 1.11            |
|         | 344 | 150            | Absolute value | 29.23 ± 3.08 | 9.25 ± 1.17  | 38.48 ± 3.05 | 3.43 ± 0.30 | 0.62 ± 0.12 | 4.05 ± 0.35 | 1.80 ± 0.35  | 6.18 ± 0.97     | 0.12 ± 2.28E-03 | 0.07 ± 0.01     |
|         |     |                | Relative value | 0.58         | 0.44         | 0.54         | 0.89        | 0.53        | 0.81        | 0.60         | 0.48            | 1.54            | 1.21            |
|         |     | 200            | Absolute value | 30.06 ± 2.48 | 6.37 ± 0.09  | 36.43 ± 2.42 | 3.33 ± 0.22 | 0.48 ± 0.06 | 3.81 ± 0.17 | 1.20 ± 0.16  | 3.64 ± 0.52     | 0.11 ± 2.80E-03 | 0.08 ± 0.01     |
|         |     |                | Relative value | 0.60         | 0.30         | 0.51         | 0.87        | 0.41        | 0.76        | 0.40         | 0.28            | 1.45            | 1.36            |
|         |     | 0              | Absolute value | 43.11 ± 2.55 | 21.32 ± 2.25 | 64.43 ± 2.57 | 4.03 ± 0.08 | 1.25 ± 0.11 | 5.28 ± 0.16 | 2.49 ± 0.72  | 10.89 ± 1.67    | 0.09 ± 3.79E-03 | 0.06 ± 3.91E-03 |
|         |     |                | Relative value | 1.00         | 1.00         | 1.00         | 1.00        | 1.00        | 1.00        | 1.00         | 1.00            | 1.00            | 1.00            |
|         | 527 | 50             | Absolute value | 39.44 ± 2.04 | 19.58 ± 1.29 | 59.02 ± 3.20 | 3.51 ± 0.08 | 1.13 ± 0.14 | 4.64 ± 0.15 | 2.32 ± 0.36  | 7.00 ± 1.21     | 0.09 ± 0.01     | 0.06 ± 3.93E-03 |
|         |     |                | Relative value | 0.91         | 0.92         | 0.92         | 0.87        | 0.90        | 0.88        | 0.93         | 0.64            | 0.95            | 0.98            |
|         |     | 100            | Absolute value | 33.52 ± 3.65 | 13.03 ± 2.24 | 46.54 ± 5.81 | 3.57 ± 0.46 | 0.79 ± 0.12 | 4.37 ± 0.56 | 2.06 ± 0.21  | 5.66 ± 1.14     | 0.11 ± 2.42E-03 | 0.06 ± 3.52E-03 |
|         |     |                | Relative value | 0.78         | 0.61         | 0.72         | 0.89        | 0.63        | 0.83        | 0.83         | 0.52            | 1.14            | 1.04            |
|         |     | 150            | Absolute value | 30.80 ± 3.92 | 7.68 ± 0.36  | 38.48 ± 4.23 | 3.56 ± 0.63 | 0.53 ± 0.09 | 4.09 ± 0.72 | 1.76 ± 0.35  | 5.37 ± 0.93     | 0.12 ± 0.01     | 0.07 ± 0.01     |
|         |     |                | Relative value | 0.71         | 0.36         | 0.60         | 0.88        | 0.42        | 0.77        | 0.71         | 0.49            | 1.23            | 1.16            |
|         | 527 | 200            | Absolute value | 24.82 ± 1.62 | 7.92 ± 0.43  | 32.74 ± 1.91 | 3.59 ± 0.02 | 0.48 ± 0.03 | 4.07 ± 0.01 | 1.11 ± 0.12  | 3.23 ± 0.64     | 0.14 ± 0.01     | 0.06 ± 8.73E-04 |
|         |     |                | Relative value | 0.58         | 0.37         | 0.51         | 0.89        | 0.38        | 0.77        | 0.44         | 0.30            | 1.55            | 1.03            |
|         |     | 0              | Absolute value | 45.11 ± 1.43 | 20.83 ± 1.28 | 65.94 ± 2.50 | 3.92 ± 0.14 | 1.14 ± 0.07 | 5.06 ± 0.20 | 3.32 ± 0.32  | 10.90 ± 2.37    | 0.09 ± 2.77E-03 | 0.05 ± 3.13E-03 |
|         |     |                | Relative value | 1.00         | 1.00         | 1.00         | 1.00        | 1.00        | 1.00        | 1.00         | 1.00            | 1.00            | 1.00            |
|         |     | 50             | Absolute value | 30.78 ± 2.86 | 19.49 ± 0.84 | 50.28 ± 2.97 | 3.42 ± 0.25 | 1.09 ± 0.07 | 4.51 ± 0.19 | 1.90 ± 0.40  | 9.69 ± 1.13     | 0.11 ± 0.02     | 0.06 ± 2.90E-03 |
|         |     |                | Relative value | 0.68         | 0.94         | 0.76         | 0.87        | 0.95        | 0.89        | 0.57         | 0.89            | 1.29            | 1.02            |
| 527     | 100 | Absolute value | 36.44 ± 1.55   | 10.90 ± 1.72 | 47.34 ± 3.16 | 3.74 ± 0.20  | 0.72 ± 0.11 | 4.46 ± 0.30 | 1.62 ± 0.26 | 8.08 ± 1.76  | 0.10 ± 3.25E-03 | 0.07 ± 0.01     |                 |
|         |     | Relative value | 0.81           | 0.52         | 0.72         | 0.95         | 0.63        | 0.88        | 0.49        | 0.74         | 1.18            | 1.21            |                 |
|         | 150 | Absolute value | 35.14 ± 1.86   | 7.52 ± 0.97  | 42.67 ± 1.45 | 3.72 ± 0.05  | 0.55 ± 0.06 | 4.27 ± 0.02 | 1.29 ± 0.21 | 6.21 ± 1.33  | 0.11 ± 0.01     | 0.07 ± 0.01     |                 |
|         |     | Relative value | 0.78           | 0.36         | 0.65         | 0.95         | 0.48        | 0.84        | 0.39        | 0.57         | 1.22            | 1.33            |                 |
|         | 200 | Absolute value | 19.41 ± 0.69   | 7.75 ± 0.85  | 27.15 ± 1.51 | 3.05 ± 0.26  | 0.52 ± 0.03 | 3.57 ± 0.29 | 0.95 ± 0.08 | 4.34 ± 1.47  | 0.16 ± 0.01     | 0.07 ± 3.70E-03 |                 |
|         |     | Relative value | 0.43           | 0.37         | 0.41         | 0.78         | 0.45        | 0.71        | 0.29        | 0.40         | 1.81            | 1.23            |                 |

Supplementary Materials S1 continued

|         |         |                |              |              |              |             |             |             |             |              |                 |                 |
|---------|---------|----------------|--------------|--------------|--------------|-------------|-------------|-------------|-------------|--------------|-----------------|-----------------|
| 667     | 0       | Absolute value | 41.10 ± 1.33 | 30.12 ± 1.50 | 71.22 ± 2.71 | 3.56 ± 0.09 | 1.68 ± 0.08 | 5.23 ± 0.09 | 2.66 ± 0.37 | 12.97 ± 1.40 | 0.09 ± 1.25E-03 | 0.06 ± 2.69E-03 |
|         |         | Relative value | 1.00         | 1.00         | 1.00         | 1.00        | 1.00        | 1.00        | 1.00        | 1.00         | 1.00            | 1.00            |
|         | 50      | Absolute value | 40.89 ± 1.41 | 16.82 ± 0.40 | 57.71 ± 1.80 | 4.20 ± 0.04 | 0.97 ± 0.05 | 5.17 ± 0.05 | 1.99 ± 0.37 | 10.73 ± 1.43 | 0.10 ± 2.87E-03 | 0.06 ± 2.50E-03 |
|         |         | Relative value | 0.99         | 0.56         | 0.81         | 1.18        | 0.58        | 0.99        | 0.75        | 0.83         | 1.19            | 1.04            |
|         | 100     | Absolute value | 34.24 ± 2.50 | 12.31 ± 0.90 | 46.55 ± 1.78 | 4.01 ± 0.18 | 0.72 ± 0.03 | 4.73 ± 0.15 | 1.73 ± 0.25 | 8.21 ± 1.43  | 0.12 ± 0.01     | 0.06 ± 4.15E-03 |
|         |         | Relative value | 0.83         | 0.41         | 0.65         | 1.13        | 0.43        | 0.90        | 0.65        | 0.63         | 1.36            | 1.05            |
|         | 150     | Absolute value | 36.22 ± 1.14 | 9.20 ± 1.32  | 45.42 ± 2.37 | 3.83 ± 0.18 | 0.64 ± 0.04 | 4.47 ± 0.15 | 1.59 ± 0.24 | 6.96 ± 1.27  | 0.11 ± 0.01     | 0.07 ± 0.01     |
|         |         | Relative value | 0.88         | 0.31         | 0.64         | 1.08        | 0.38        | 0.85        | 0.60        | 0.54         | 1.22            | 1.26            |
|         | 200     | Absolute value | 29.17 ± 1.40 | 5.37 ± 0.33  | 34.54 ± 1.44 | 3.58 ± 0.08 | 0.39 ± 0.04 | 3.97 ± 0.09 | 1.17 ± 0.12 | 4.71 ± 0.54  | 0.12 ± 3.53E-03 | 0.07 ± 4.12E-03 |
|         |         | Relative value | 0.71         | 0.18         | 0.49         | 1.01        | 0.23        | 0.76        | 0.44        | 0.36         | 1.42            | 1.29            |
|         | Average | Absolute value | 44.94 ± 4.02 | 23.31 ± 4.55 | 68.25 ± 3.59 | 3.84 ± 0.20 | 1.31 ± 0.25 | 5.15 ± 0.13 | 2.87 ± 0.37 | 11.90 ± 1.16 | 0.09 ± 0.01     | 0.06 ± 1.79E-03 |
|         |         | Relative value | 1.00         | 1.00         | 1.00         | 1.00        | 1.00        | 1.00        | 1.00        | 1.00         | 1.00            | 1.00            |
|         | 50      | Absolute value | 36.35 ± 4.66 | 17.92 ± 1.91 | 54.27 ± 4.75 | 3.69 ± 0.35 | 1.03 ± 0.10 | 4.72 ± 0.31 | 2.14 ± 0.23 | 9.15 ± 1.57  | 0.10 ± 0.01     | 0.06 ± 1.13E-03 |
|         |         | Relative value | 0.82         | 0.79         | 0.80         | 0.97        | 0.81        | 0.92        | 0.76        | 0.77         | 1.21            | 1.02            |
|         | 100     | Absolute value | 35.46 ± 1.91 | 11.82 ± 1.03 | 47.27 ± 1.00 | 3.80 ± 0.19 | 0.73 ± 0.05 | 4.53 ± 0.15 | 1.87 ± 0.22 | 7.36 ± 1.17  | 0.11 ± 0.01     | 0.06 ± 3.35E-03 |
|         |         | Relative value | 0.79         | 0.52         | 0.69         | 0.99        | 0.57        | 0.88        | 0.66        | 0.62         | 1.26            | 1.10            |
|         | 150     | Absolute value | 32.85 ± 3.36 | 8.41 ± 0.94  | 41.26 ± 3.40 | 3.64 ± 0.18 | 0.59 ± 0.06 | 4.22 ± 0.19 | 1.61 ± 0.23 | 6.18 ± 0.65  | 0.11 ± 0.01     | 0.07 ± 2.69E-03 |
|         |         | Relative value | 0.74         | 0.37         | 0.61         | 0.95        | 0.45        | 0.82        | 0.57        | 0.52         | 1.30            | 1.24            |
|         | 200     | Absolute value | 25.87 ± 4.88 | 6.85 ± 1.21  | 32.72 ± 4.00 | 3.39 ± 0.26 | 0.47 ± 0.06 | 3.85 ± 0.22 | 1.11 ± 0.11 | 3.98 ± 0.67  | 0.13 ± 0.02     | 0.07 ± 0.01     |
|         |         | Relative value | 0.58         | 0.31         | 0.48         | 0.89        | 0.37        | 0.75        | 0.39        | 0.34         | 1.56            | 1.22            |
| HST (5) | 137     | Absolute value | 51.20 ± 2.87 | 20.60 ± 2.24 | 71.80 ± 4.35 | 3.98 ± 0.29 | 1.06 ± 0.13 | 5.05 ± 0.35 | 4.74 ± 0.51 | 13.72 ± 2.22 | 0.08 ± 1.35E-03 | 0.05 ± 5.41E-04 |
|         |         | Relative value | 1.00         | 1.00         | 1.00         | 1.00        | 1.00        | 1.00        | 1.00        | 1.00         | 1.00            | 1.00            |
|         | 50      | Absolute value | 43.53 ± 0.53 | 16.07 ± 1.69 | 59.60 ± 1.78 | 3.68 ± 0.19 | 0.97 ± 0.09 | 4.65 ± 0.24 | 3.23 ± 0.51 | 11.06 ± 2.31 | 0.08 ± 3.25E-03 | 0.06 ± 2.49E-03 |
|         |         | Relative value | 0.85         | 0.78         | 0.83         | 0.92        | 0.92        | 0.92        | 0.68        | 0.81         | 1.09            | 1.18            |
|         | 100     | Absolute value | 40.79 ± 1.20 | 12.34 ± 1.91 | 53.13 ± 2.75 | 3.45 ± 0.11 | 0.77 ± 0.05 | 4.22 ± 0.13 | 2.83 ± 0.33 | 7.64 ± 1.59  | 0.08 ± 2.80E-04 | 0.06 ± 0.01     |
|         |         | Relative value | 0.80         | 0.60         | 0.74         | 0.87        | 0.72        | 0.84        | 0.60        | 0.56         | 1.09            | 1.22            |
|         | 150     | Absolute value | 40.70 ± 0.43 | 11.72 ± 1.40 | 52.42 ± 1.83 | 3.49 ± 0.18 | 0.74 ± 0.03 | 4.23 ± 0.21 | 2.19 ± 0.26 | 7.53 ± 1.19  | 0.09 ± 3.61E-03 | 0.06 ± 0.01     |
|         |         | Relative value | 0.79         | 0.57         | 0.73         | 0.88        | 0.70        | 0.84        | 0.46        | 0.55         | 1.10            | 1.24            |
|         | 200     | Absolute value | 39.87 ± 0.88 | 9.43 ± 1.27  | 49.29 ± 0.96 | 3.46 ± 0.16 | 0.64 ± 0.05 | 4.10 ± 0.18 | 1.69 ± 0.29 | 5.83 ± 0.96  | 0.09 ± 0.01     | 0.07 ± 0.01     |
|         |         | Relative value | 0.78         | 0.46         | 0.69         | 0.87        | 0.60        | 0.81        | 0.36        | 0.43         | 1.12            | 1.32            |
|         | 370     | Absolute value | 54.06 ± 3.49 | 20.77 ± 1.76 | 74.83 ± 5.17 | 3.95 ± 0.19 | 1.18 ± 0.04 | 5.13 ± 0.23 | 3.63 ± 0.37 | 8.81 ± 1.87  | 0.07 ± 2.10E-03 | 0.06 ± 3.02E-03 |
|         |         | Relative value | 1.00         | 1.00         | 1.00         | 1.00        | 1.00        | 1.00        | 1.00        | 1.00         | 1.00            | 1.00            |
|         | 50      | Absolute value | 45.03 ± 1.51 | 19.81 ± 1.73 | 64.84 ± 0.54 | 3.73 ± 0.19 | 1.16 ± 0.07 | 4.88 ± 0.19 | 2.40 ± 0.30 | 8.16 ± 1.69  | 0.08 ± 1.90E-03 | 0.06 ± 3.18E-03 |
|         |         | Relative value | 0.83         | 0.95         | 0.87         | 0.94        | 0.98        | 0.95        | 0.66        | 0.93         | 1.13            | 1.03            |
|         | 100     | Absolute value | 43.21 ± 1.91 | 15.61 ± 0.96 | 58.82 ± 2.86 | 3.65 ± 0.07 | 0.91 ± 0.01 | 4.56 ± 0.06 | 2.41 ± 0.31 | 6.81 ± 1.20  | 0.08 ± 2.44E-03 | 0.06 ± 4.24E-03 |
|         |         | Relative value | 0.80         | 0.75         | 0.79         | 0.92        | 0.77        | 0.89        | 0.66        | 0.77         | 1.16            | 1.03            |
|         | 150     | Absolute value | 38.78 ± 1.72 | 14.48 ± 1.07 | 53.26 ± 2.62 | 3.52 ± 0.21 | 0.86 ± 0.07 | 4.38 ± 0.28 | 1.90 ± 0.33 | 6.92 ± 0.84  | 0.09 ± 1.86E-03 | 0.06 ± 2.72E-03 |
|         |         | Relative value | 0.72         | 0.70         | 0.71         | 0.89        | 0.73        | 0.85        | 0.52        | 0.79         | 1.24            | 1.05            |
|         | 200     | Absolute value | 29.12 ± 2.58 | 10.96 ± 2.32 | 40.08 ± 3.78 | 3.29 ± 0.22 | 0.73 ± 0.16 | 4.02 ± 0.31 | 1.55 ± 0.20 | 5.81 ± 0.96  | 0.11 ± 2.45E-03 | 0.07 ± 3.32E-03 |
|         |         | Relative value | 0.54         | 0.53         | 0.54         | 0.83        | 0.62        | 0.78        | 0.43        | 0.66         | 1.55            | 1.17            |
| 460     | 0       | Absolute value | 54.09 ± 3.51 | 24.12 ± 1.33 | 78.22 ± 4.43 | 3.92 ± 0.28 | 1.52 ± 0.11 | 5.45 ± 0.38 | 2.45 ± 0.33 | 10.44 ± 1.11 | 0.07 ± 0.01     | 0.06 ± 1.04E-03 |
|         |         | Relative value | 1.00         | 1.00         | 1.00         | 1.00        | 1.00        | 1.00        | 1.00        | 1.00         | 1.00            | 1.00            |
|         | 50      | Absolute value | 40.95 ± 1.97 | 18.16 ± 1.84 | 59.10 ± 3.50 | 3.73 ± 0.29 | 1.07 ± 0.09 | 4.80 ± 0.36 | 1.75 ± 0.15 | 8.80 ± 0.70  | 0.09 ± 2.84E-03 | 0.06 ± 1.40E-03 |
|         |         | Relative value | 0.76         | 0.75         | 0.76         | 0.95        | 0.70        | 0.88        | 0.72        | 0.84         | 1.25            | 0.94            |
|         | 100     | Absolute value | 37.25 ± 2.78 | 13.77 ± 1.01 | 51.01 ± 3.36 | 3.79 ± 0.23 | 0.84 ± 0.09 | 4.63 ± 0.32 | 1.63 ± 0.12 | 6.72 ± 1.12  | 0.10 ± 3.11E-03 | 0.06 ± 2.86E-03 |
|         |         | Relative value | 0.69         | 0.57         | 0.65         | 0.97        | 0.55        | 0.85        | 0.67        | 0.64         | 1.40            | 0.96            |

Supplementary Materials S1 continued

|         |     |                |              |              |              |             |             |             |             |              |                 |                 |
|---------|-----|----------------|--------------|--------------|--------------|-------------|-------------|-------------|-------------|--------------|-----------------|-----------------|
| 475     | 150 | Absolute value | 36.85 ± 1.35 | 10.36 ± 1.03 | 47.21 ± 2.37 | 3.75 ± 0.12 | 0.67 ± 0.12 | 4.42 ± 0.23 | 1.25 ± 0.14 | 6.09 ± 0.53  | 0.10 ± 1.89E-03 | 0.06 ± 0.01     |
|         |     | Relative value | 0.68         | 0.43         | 0.60         | 0.95        | 0.44        | 0.81        | 0.51        | 0.58         | 1.40            | 1.02            |
|         | 200 | Absolute value | 30.39 ± 4.28 | 6.65 ± 0.15  | 37.04 ± 4.41 | 3.45 ± 0.38 | 0.44 ± 0.03 | 3.89 ± 0.40 | 1.12 ± 0.07 | 4.87 ± 0.72  | 0.11 ± 0.01     | 0.07 ± 3.44E-03 |
|         |     | Relative value | 0.56         | 0.28         | 0.47         | 0.88        | 0.29        | 0.71        | 0.46        | 0.47         | 1.57            | 1.05            |
|         | 0   | Absolute value | 46.13 ± 0.31 | 28.73 ± 0.99 | 74.86 ± 1.02 | 4.03 ± 0.12 | 1.40 ± 0.12 | 5.43 ± 0.22 | 1.97 ± 0.30 | 12.72 ± 1.79 | 0.09 ± 2.30E-03 | 0.05 ± 2.68E-03 |
|         |     | Relative value | 1.00         | 1.00         | 1.00         | 1.00        | 1.00        | 1.00        | 1.00        | 1.00         | 1.00            | 1.00            |
|         | 50  | Absolute value | 42.68 ± 3.04 | 16.48 ± 0.69 | 59.15 ± 3.33 | 3.85 ± 0.22 | 0.93 ± 0.07 | 4.78 ± 0.17 | 1.53 ± 0.21 | 10.25 ± 1.56 | 0.09 ± 1.39E-03 | 0.06 ± 4.29E-03 |
|         |     | Relative value | 0.93         | 0.57         | 0.79         | 0.96        | 0.67        | 0.88        | 0.78        | 0.81         | 1.03            | 1.16            |
|         | 100 | Absolute value | 37.61 ± 0.73 | 18.52 ± 0.92 | 56.13 ± 1.16 | 3.48 ± 0.07 | 1.07 ± 0.08 | 4.56 ± 0.15 | 1.37 ± 0.28 | 6.97 ± 1.56  | 0.09 ± 3.47E-03 | 0.06 ± 0.01     |
|         |     | Relative value | 0.82         | 0.64         | 0.75         | 0.86        | 0.77        | 0.84        | 0.70        | 0.55         | 1.06            | 1.19            |
|         | 150 | Absolute value | 37.14 ± 0.45 | 10.55 ± 1.40 | 47.69 ± 1.59 | 3.48 ± 0.13 | 0.72 ± 0.03 | 4.20 ± 0.12 | 1.17 ± 0.11 | 6.53 ± 1.32  | 0.09 ± 4.20E-03 | 0.07 ± 0.01     |
|         |     | Relative value | 0.81         | 0.37         | 0.64         | 0.87        | 0.51        | 0.77        | 0.60        | 0.51         | 1.07            | 1.41            |
|         | 200 | Absolute value | 33.23 ± 1.35 | 5.01 ± 0.43  | 38.23 ± 1.33 | 3.66 ± 0.17 | 0.35 ± 0.07 | 4.01 ± 0.21 | 1.14 ± 0.11 | 6.00 ± 0.98  | 0.11 ± 0.01     | 0.07 ± 0.01     |
|         |     | Relative value | 0.72         | 0.17         | 0.51         | 0.91        | 0.25        | 0.74        | 0.58        | 0.47         | 1.26            | 1.43            |
| Average | 0   | Absolute value | 51.37 ± 3.75 | 23.56 ± 3.81 | 74.93 ± 2.62 | 3.97 ± 0.05 | 1.29 ± 0.21 | 5.26 ± 0.20 | 3.20 ± 1.24 | 11.42 ± 2.22 | 0.08 ± 0.01     | 0.06 ± 0.01     |
|         |     | Relative value | 1.00         | 1.00         | 1.00         | 1.00        | 1.00        | 1.00        | 1.00        | 1.00         | 1.00            | 1.00            |
|         | 50  | Absolute value | 43.05 ± 1.70 | 17.63 ± 1.71 | 60.67 ± 2.79 | 3.75 ± 0.07 | 1.03 ± 0.10 | 4.78 ± 0.10 | 2.23 ± 0.76 | 9.57 ± 1.32  | 0.09 ± 4.09E-03 | 0.06 ± 1.66E-03 |
|         |     | Relative value | 0.84         | 0.76         | 0.81         | 0.94        | 0.82        | 0.91        | 0.71        | 0.85         | 1.13            | 1.08            |
|         | 100 | Absolute value | 39.71 ± 2.82 | 15.06 ± 2.67 | 54.77 ± 3.42 | 3.59 ± 0.16 | 0.90 ± 0.13 | 4.49 ± 0.18 | 2.06 ± 0.67 | 7.04 ± 0.42  | 0.09 ± 0.01     | 0.06 ± 2.11E-03 |
|         |     | Relative value | 0.77         | 0.64         | 0.73         | 0.91        | 0.70        | 0.85        | 0.66        | 0.63         | 1.18            | 1.10            |
|         | 150 | Absolute value | 38.37 ± 1.77 | 11.78 ± 1.90 | 50.15 ± 3.14 | 3.56 ± 0.13 | 0.75 ± 0.08 | 4.31 ± 0.11 | 1.63 ± 0.50 | 6.77 ± 0.61  | 0.09 ± 0.01     | 0.06 ± 3.66E-03 |
|         |     | Relative value | 0.75         | 0.52         | 0.67         | 0.90        | 0.60        | 0.82        | 0.52        | 0.61         | 1.20            | 1.18            |
|         | 200 | Absolute value | 33.15 ± 4.79 | 8.01 ± 2.68  | 41.16 ± 5.56 | 3.46 ± 0.15 | 0.54 ± 0.17 | 4.00 ± 0.09 | 1.37 ± 0.29 | 5.63 ± 0.51  | 0.11 ± 0.01     | 0.07 ± 1.65E-03 |
|         |     | Relative value | 0.65         | 0.36         | 0.55         | 0.87        | 0.44        | 0.76        | 0.45        | 0.51         | 1.37            | 1.24            |

The data is the average ± SD, n = 4. / indicates no determination due to too high salt stress.
