# Supplementary material for: Root Na+ Content Negatively Correlated to Salt Tolerance Determines the Salt Tolerance of Brassica napus L. Inbred Seedlings
Source: MDPI journal article supplement (doi:10.3390/plants11070906), 2022-03-29
Supplement: s1 [file s1]

Supplementary Materials S2. Ion contents and related indexes for the *B. napus* lines in the different salt-tolerance grades under different degrees of NaCl stress

| Salt tolerance levels | No. of inbred lines | NaCl levels | ion content     |                 |                 |                 |                  |               |                                 |                 |                                   |                 | S <sub>K, Na</sub> | S <sub>Ca, Na</sub> | S <sub>Na</sub> | S <sub>K</sub>  | S <sub>Ca</sub> |
|-----------------------|---------------------|-------------|-----------------|-----------------|-----------------|-----------------|------------------|---------------|---------------------------------|-----------------|-----------------------------------|-----------------|--------------------|---------------------|-----------------|-----------------|-----------------|
|                       |                     |             | Na <sup>+</sup> |                 | K <sup>+</sup>  |                 | Ca <sup>2+</sup> |               | K <sup>+</sup> /Na <sup>+</sup> |                 | Ca <sup>2+</sup> /Na <sup>+</sup> |                 |                    |                     |                 |                 |                 |
|                       |                     |             | Shoot (mmol/g)  | Root (mmol/g)   | Shoot (mmol/g)  | Root (mmol/g)   | Shoot (mmol/g)   | Root (mmol/g) | Shoot                           | Root            | Shoot                             | Root            |                    |                     |                 |                 |                 |
| HSS (1)               | 557                 | 0           | 0.63 ± 0.04     | 1.13 ± 0.08     | 0.10 ± 4.37E-03 | 0.24 ± 0.02     | 0.56 ± 0.03      | 0.69 ± 0.03   | 0.16 ± 0.02                     | 0.21 ± 0.01     | 0.89 ± 0.10                       | 0.62 ± 0.05     | 0.77 ± 0.07        | 1.46 ± 0.29         | 0.57 ± 0.07     | 0.44 ± 0.03     | 0.81 ± 0.06     |
|                       |                     | 50          | 1.21 ± 0.06     | 1.48 ± 0.08     | 0.06 ± 0.01     | 0.17 ± 2.90E-03 | 0.48 ± 0.03      | 0.63 ± 0.01   | 0.05 ± 0.01                     | 0.12 ± 0.01     | 0.39 ± 0.01                       | 0.43 ± 0.01     | 0.43 ± 0.05        | 0.92 ± 0.04         | 0.82 ± 0.04     | 0.35 ± 0.04     | 0.75 ± 0.04     |
|                       |                     | 100         | 1.66 ± 0.05     | 1.64 ± 0.04     | 0.04 ± 0.01     | 0.10 ± 0.01     | 0.39 ± 0.03      | 0.55 ± 0.01   | 0.02 ± 0.01                     | 0.06 ± 0.01     | 0.24 ± 0.03                       | 0.34 ± 0.01     | 0.40 ± 0.13        | 0.70 ± 0.10         | 1.02 ± 0.06     | 0.40 ± 0.12     | 0.71 ± 0.06     |
|                       |                     | 150         | 2.24 ± 0.18     | 2.06 ± 0.16     | 0.04 ± 0.01     | 0.08 ± 0.01     | 0.37 ± 0.03      | 0.43 ± 0.02   | 0.02 ± 3.14E-03                 | 0.04 ± 3.14E-03 | 0.16 ± 3.92E-03                   | 0.21 ± 0.01     | 0.51 ± 0.04        | 0.79 ± 0.06         | 1.10 ± 0.17     | 0.56 ± 0.08     | 0.86 ± 0.09     |
|                       |                     | 200         | /               | 1.92 ± 0.14     | /               | 0.05 ± 0.01     | /                | 0.31 ± 0.04   | /                               | 0.03 ± 3.99E-03 | /                                 | 0.16 ± 0.02     | /                  | /                   | /               | /               | /               |
|                       | 611                 | 0           | 0.58 ± 0.03     | 0.94 ± 0.08     | 0.13 ± 0.01     | 0.23 ± 0.02     | 0.62 ± 0.02      | 0.74 ± 0.01   | 0.22 ± 0.03                     | 0.25 ± 0.03     | 1.06 ± 0.06                       | 0.78 ± 0.06     | 0.89 ± 0.12        | 1.37 ± 0.18         | 0.62 ± 0.07     | 0.54 ± 0.02     | 0.84 ± 0.04     |
|                       |                     | 50          | 1.13 ± 0.05     | 1.46 ± 0.05     | 0.09 ± 0.01     | 0.20 ± 0.02     | 0.55 ± 0.03      | 0.65 ± 0.06   | 0.08 ± 0.01                     | 0.14 ± 0.02     | 0.49 ± 0.05                       | 0.45 ± 0.04     | 0.59 ± 0.15        | 1.09 ± 0.05         | 0.77 ± 0.03     | 0.46 ± 0.10     | 0.85 ± 0.07     |
|                       |                     | 100         | 1.56 ± 0.05     | 1.61 ± 0.04     | 0.07 ± 0.01     | 0.11 ± 0.01     | 0.49 ± 0.04      | 0.61 ± 0.02   | 0.04 ± 2.97E-03                 | 0.07 ± 0.01     | 0.31 ± 0.02                       | 0.38 ± 0.01     | 0.66 ± 0.03        | 0.83 ± 0.07         | 0.97 ± 0.03     | 0.64 ± 0.02     | 0.80 ± 0.08     |
|                       |                     | 150         | 2.03 ± 0.14     | 1.88 ± 0.04     | 0.07 ± 2.90E-03 | 0.08 ± 3.16E-03 | 0.39 ± 0.01      | 0.50 ± 0.04   | 0.03 ± 3.29E-03                 | 0.04 ± 2.02E-03 | 0.19 ± 0.02                       | 0.26 ± 0.02     | 0.79 ± 0.04        | 0.73 ± 0.12         | 1.08 ± 0.05     | 0.85 ± 2.87E-03 | 0.78 ± 0.09     |
|                       |                     | 200         | 2.13 ± 0.09     | 1.90 ± 0.16     | 0.04 ± 1.63E-03 | 0.06 ± 0.01     | 0.34 ± 0.02      | 0.36 ± 0.03   | 0.02 ± 1.62E-03                 | 0.03 ± 0.01     | 0.16 ± 0.01                       | 0.19 ± 0.02     | 0.64 ± 0.17        | 0.87 ± 0.18         | 1.12 ± 0.10     | 0.71 ± 0.13     | 0.96 ± 0.12     |
|                       | 668                 | 0           | 0.61 ± 0.05     | 1.16 ± 0.05     | 0.10 ± 0.01     | 0.21 ± 0.03     | 0.53 ± 0.03      | 0.69 ± 0.02   | 0.17 ± 3.68E-03                 | 0.18 ± 0.02     | 0.87 ± 0.03                       | 0.60 ± 0.03     | 0.92 ± 0.13        | 1.45 ± 0.03         | 0.52 ± 0.02     | 0.48 ± 0.05     | 0.76 ± 0.03     |
|                       |                     | 50          | 1.14 ± 0.03     | 1.52 ± 0.06     | 0.08 ± 0.01     | 0.19 ± 0.01     | 0.48 ± 0.04      | 0.65 ± 0.03   | 0.07 ± 4.07E-03                 | 0.12 ± 0.01     | 0.42 ± 0.03                       | 0.43 ± 0.03     | 0.56 ± 0.08        | 0.98 ± 0.14         | 0.75 ± 0.01     | 0.42 ± 0.06     | 0.74 ± 0.10     |
|                       |                     | 100         | 1.52 ± 0.20     | 1.69 ± 0.13     | 0.05 ± 3.27E-03 | 0.08 ± 3.39E-03 | 0.42 ± 0.02      | 0.58 ± 0.02   | 0.04 ± 0.01                     | 0.05 ± 2.80E-03 | 0.28 ± 0.04                       | 0.34 ± 0.04     | 0.72 ± 0.12        | 0.81 ± 0.08         | 0.90 ± 0.08     | 0.64 ± 0.04     | 0.72 ± 5.37E-04 |
|                       |                     | 150         | 2.22 ± 0.19     | 1.91 ± 0.13     | 0.05 ± 0.01     | 0.07 ± 4.31E-03 | 0.39 ± 0.02      | 0.44 ± 0.04   | 0.02 ± 2.15E-03                 | 0.04 ± 3.97E-03 | 0.18 ± 0.02                       | 0.23 ± 0.03     | 0.55 ± 0.11        | 0.77 ± 0.05         | 1.16 ± 0.05     | 0.64 ± 0.11     | 0.90 ± 0.08     |
|                       |                     | 200         | 2.23 ± 0.15     | 1.89 ± 0.23     | 0.04 ± 0.01     | 0.07 ± 0.01     | 0.34 ± 0.04      | 0.37 ± 0.02   | 0.02 ± 2.45E-03                 | 0.04 ± 0.01     | 0.15 ± 0.02                       | 0.20 ± 0.03     | 0.56 ± 0.15        | 0.77 ± 0.09         | 1.19 ± 0.06     | 0.67 ± 0.18     | 0.91 ± 0.07     |
|                       | 703                 | 0           | 0.56 ± 0.07     | 0.97 ± 0.05     | 0.09 ± 0.01     | 0.23 ± 0.02     | 0.58 ± 0.01      | 0.68 ± 0.04   | 0.16 ± 0.01                     | 0.24 ± 0.02     | 1.06 ± 0.14                       | 0.70 ± 0.03     | 0.70 ± 0.08        | 1.53 ± 0.26         | 0.57 ± 0.09     | 0.40 ± 0.08     | 0.86 ± 0.06     |
|                       |                     | 50          | 1.07 ± 0.09     | 1.51 ± 0.04     | 0.06 ± 0.01     | 0.17 ± 0.01     | 0.51 ± 0.13      | 0.63 ± 0.01   | 0.06 ± 4.87E-03                 | 0.12 ± 0.01     | 0.47 ± 0.09                       | 0.42 ± 3.37E-03 | 0.52 ± 0.05        | 1.13 ± 0.21         | 0.71 ± 0.05     | 0.37 ± 0.05     | 0.81 ± 0.21     |
|                       |                     | 100         | 1.63 ± 0.15     | 1.60 ± 0.06     | 0.06 ± 1.08E-03 | 0.09 ± 0.02     | 0.45 ± 0.05      | 0.57 ± 0.02   | 0.03 ± 3.71E-03                 | 0.06 ± 0.01     | 0.28 ± 0.02                       | 0.35 ± 0.02     | 0.62 ± 0.13        | 0.78 ± 0.09         | 1.02 ± 0.13     | 0.63 ± 0.12     | 0.79 ± 0.10     |
|                       |                     | 150         | 1.91 ± 0.10     | 2.16 ± 0.17     | 0.05 ± 0.01     | 0.08 ± 0.01     | 0.37 ± 0.05      | 0.45 ± 0.04   | 0.03 ± 4.50E-03                 | 0.04 ± 3.68E-03 | 0.19 ± 0.03                       | 0.21 ± 0.03     | 0.81 ± 0.12        | 0.92 ± 0.07         | 0.89 ± 0.10     | 0.71 ± 0.05     | 0.82 ± 0.04     |
|                       |                     | 200         | 2.08 ± 0.15     | 2.04 ± 0.08     | 0.04 ± 2.03E-03 | 0.07 ± 1.42E-03 | 0.33 ± 0.04      | 0.31 ± 0.02   | 0.02 ± 1.48E-03                 | 0.03 ± 1.71E-03 | 0.16 ± 0.02                       | 0.15 ± 0.02     | 0.57 ± 0.02        | 1.04 ± 0.12         | 1.02 ± 0.06     | 0.59 ± 0.04     | 1.07 ± 0.18     |
|                       | Average             | 0           | 0.59 ± 0.03     | 1.05 ± 0.11     | 0.11 ± 0.01     | 0.23 ± 0.01     | 0.57 ± 0.04      | 0.70 ± 0.03   | 0.18 ± 0.03                     | 0.22 ± 0.03     | 0.97 ± 0.11                       | 0.67 ± 0.08     | 0.82 ± 0.10        | 1.45 ± 0.07         | 0.57 ± 0.04     | 0.47 ± 0.06     | 0.82 ± 0.04     |
|                       |                     | 50          | 1.14 ± 0.06     | 1.49 ± 0.03     | 0.07 ± 0.01     | 0.18 ± 0.01     | 0.51 ± 0.04      | 0.64 ± 0.01   | 0.06 ± 0.01                     | 0.12 ± 0.01     | 0.44 ± 0.04                       | 0.43 ± 0.01     | 0.53 ± 0.07        | 1.03 ± 0.10         | 0.76 ± 0.04     | 0.40 ± 0.05     | 0.79 ± 0.05     |
|                       |                     | 100         | 1.59 ± 0.06     | 1.64 ± 0.04     | 0.05 ± 0.01     | 0.09 ± 0.01     | 0.44 ± 0.04      | 0.58 ± 0.02   | 0.03 ± 0.01                     | 0.06 ± 0.01     | 0.28 ± 0.03                       | 0.35 ± 0.02     | 0.60 ± 0.14        | 0.78 ± 0.05         | 0.98 ± 0.06     | 0.58 ± 0.12     | 0.76 ± 0.05     |
|                       |                     | 150         | 2.10 ± 0.16     | 2.00 ± 0.13     | 0.05 ± 0.01     | 0.08 ± 1.70E-03 | 0.38 ± 0.01      | 0.45 ± 0.03   | 0.03 ± 0.01                     | 0.04 ± 2.70E-03 | 0.18 ± 0.01                       | 0.23 ± 0.03     | 0.66 ± 0.16        | 0.80 ± 0.08         | 1.06 ± 0.12     | 0.69 ± 0.12     | 0.84 ± 0.05     |
|                       |                     | 200         | 2.15 ± 0.08     | 1.94 ± 0.07     | 0.04 ± 2.16E-03 | 0.06 ± 0.01     | 0.34 ± 4.32E-03  | 0.34 ± 0.03   | 0.02 ± 9.38E-04                 | 0.03 ± 3.37E-03 | 0.16 ± 4.90E-03                   | 0.17 ± 0.02     | 0.59 ± 0.04        | 0.89 ± 0.14         | 1.11 ± 0.08     | 0.65 ± 0.06     | 0.98 ± 0.08     |
| SS (2)                | 40                  | 0           | 0.63 ± 0.01     | 1.09 ± 0.11     | 0.12 ± 0.01     | 0.23 ± 0.01     | 0.56 ± 0.03      | 0.74 ± 0.02   | 0.18 ± 0.01                     | 0.21 ± 0.01     | 0.89 ± 0.06                       | 0.68 ± 0.06     | 0.88 ± 0.07        | 1.32 ± 0.13         | 0.58 ± 0.06     | 0.51 ± 0.07     | 0.76 ± 0.05     |
|                       |                     | 50          | 1.14 ± 0.04     | 1.48 ± 4.60E-03 | 0.06 ± 4.81E-03 | 0.19 ± 0.01     | 0.47 ± 0.03      | 0.67 ± 0.02   | 0.06 ± 0.01                     | 0.13 ± 0.01     | 0.42 ± 0.04                       | 0.45 ± 0.01     | 0.44 ± 0.02        | 0.92 ± 0.09         | 0.77 ± 0.03     | 0.33 ± 3.21E-03 | 0.70 ± 0.05     |
|                       |                     | 100         | 1.54 ± 0.08     | 1.58 ± 0.03     | 0.06 ± 0.01     | 0.11 ± 0.07     | 0.48 ± 0.06      | 0.60 ± 0.03   | 0.04 ± 3.53E-03                 | 0.07 ± 0.05     | 0.31 ± 0.04                       | 0.38 ± 0.02     | 0.71 ± 0.38        | 0.82 ± 0.07         | 0.98 ± 0.07     | 0.69 ± 0.38     | 0.80 ± 0.06     |
|                       |                     | 150         | 1.86 ± 0.07     | 1.72 ± 0.01     | 0.05 ± 0.01     | 0.09 ± 0.02     | 0.42 ± 0.02      | 0.45 ± 0.03   | 0.03 ± 0.01                     | 0.05 ± 0.01     | 0.23 ± 0.01                       | 0.26 ± 0.02     | 0.54 ± 0.20        | 0.87 ± 0.03         | 1.08 ± 0.04     | 0.58 ± 0.20     | 0.94 ± 0.03     |
|                       |                     | 200         | 1.94 ± 0.10     | 1.76 ± 0.04     | 0.05 ± 0.01     | 0.07 ± 0.01     | 0.35 ± 0.02      | 0.39 ± 0.01   | 0.02 ± 3.55E-03                 | 0.04 ± 2.31E-03 | 0.18 ± 0.01                       | 0.22 ± 0.01     | 0.59 ± 0.09        | 0.82 ± 0.05         | 1.10 ± 0.07     | 0.65 ± 0.10     | 0.90 ± 0.04     |
|                       | 74                  | 0           | 0.51 ± 0.03     | 0.96 ± 0.03     | 0.11 ± 0.01     | 0.25 ± 0.02     | 0.58 ± 0.01      | 0.71 ± 0.04   | 0.23 ± 0.01                     | 0.26 ± 0.03     | 1.15 ± 0.06                       | 0.75 ± 0.05     | 0.86 ± 0.06        | 1.55 ± 0.19         | 0.53 ± 0.05     | 0.46 ± 0.03     | 0.82 ± 0.05     |
|                       |                     | 50          | 1.25 ± 0.06     | 1.51 ± 0.01     | 0.06 ± 2.45E-03 | 0.18 ± 0.01     | 0.48 ± 0.05      | 0.65 ± 0.02   | 0.05 ± 7.46E-04                 | 0.12 ± 0.01     | 0.38 ± 0.02                       | 0.43 ± 0.01     | 0.43 ± 0.03        | 0.89 ± 0.07         | 0.83 ± 0.05     | 0.35 ± 0.01     | 0.74 ± 0.08     |
|                       |                     | 100         | 1.60 ± 0.07     | 1.56 ± 0.02     | 0.06 ± 0.01     | 0.10 ± 0.01     | 0.42 ± 0.05      | 0.59 ± 0.03   | 0.04 ± 3.29E-03                 | 0.06 ± 0.01     | 0.26 ± 0.03                       | 0.38 ± 0.02     | 0.59 ± 0.04        | 0.71 ± 0.12         | 1.02 ± 0.06     | 0.60 ± 0.01     | 0.72 ± 0.10     |
|                       |                     | 150         | 2.19 ± 0.03     | 1.88 ± 0.08     | 0.06 ± 2.43E-03 | 0.08 ± 0.01     | 0.41 ± 0.06      | 0.47 ± 0.04   | 0.03 ± 7.13E-04                 | 0.04 ± 0.01     | 0.19 ± 0.03                       | 0.25 ± 0.03     | 0.64 ± 0.11        | 0.76 ± 0.22         | 1.17 ± 0.06     | 0.75 ± 0.14     | 0.88 ± 0.21     |
|                       |                     | 200         | 2.05 ± 0.09     | 1.91 ± 0.09     | 0.05 ± 0.01     | 0.06 ± 2.47E-03 | 0.31 ± 0.02      | 0.34 ± 0.02   | 0.02 ± 0.01                     | 0.03 ± 2.53E-03 | 0.15 ± 0.01                       | 0.18 ± 0.02     | 0.79 ± 0.11        | 0.85 ± 0.09         | 1.07 ± 0.09     | 0.85 ± 0.16     | 0.90 ± 0.05     |
|                       | 277                 | 0           | 0.54 ± 0.05     | 1.09 ± 0.05     | 0.11 ± 0.03     | 0.26 ± 0.01     | 0.51 ± 0.01      | 0.71 ± 0.02   | 0.20 ± 0.05                     |                 |                                   |                 |                    |                     |                 |                 |                 |

Supplementary Materials S2 continued

|         |         |     |             |             |                 |                 |                 |             |                 |                 |                 |             |             |             |             |             |             |
|---------|---------|-----|-------------|-------------|-----------------|-----------------|-----------------|-------------|-----------------|-----------------|-----------------|-------------|-------------|-------------|-------------|-------------|-------------|
|         |         | 50  | 1.11 ± 0.11 | 1.51 ± 0.03 | 0.07 ± 0.01     | 0.19 ± 0.01     | 0.49 ± 0.03     | 0.66 ± 0.02 | 0.07 ± 0.02     | 0.13 ± 0.01     | 0.45 ± 0.06     | 0.44 ± 0.02 | 0.53 ± 0.11 | 1.04 ± 0.17 | 0.73 ± 0.08 | 0.38 ± 0.05 | 0.76 ± 0.07 |
|         |         | 100 | 1.56 ± 0.08 | 1.66 ± 0.10 | 0.06 ± 3.31E-03 | 0.10 ± 0.01     | 0.42 ± 0.05     | 0.60 ± 0.01 | 0.04 ± 4.06E-03 | 0.06 ± 0.01     | 0.27 ± 0.03     | 0.37 ± 0.02 | 0.67 ± 0.05 | 0.73 ± 0.07 | 0.95 ± 0.08 | 0.63 ± 0.06 | 0.69 ± 0.08 |
|         |         | 150 | 2.01 ± 0.15 | 1.85 ± 0.17 | 0.05 ± 0.01     | 0.08 ± 0.01     | 0.39 ± 0.03     | 0.44 ± 0.03 | 0.03 ± 1.09E-03 | 0.04 ± 0.01     | 0.19 ± 0.02     | 0.24 ± 0.02 | 0.65 ± 0.09 | 0.83 ± 0.05 | 1.09 ± 0.07 | 0.70 ± 0.08 | 0.90 ± 0.05 |
|         |         | 200 | 2.01 ± 0.11 | 1.87 ± 0.12 | 0.05 ± 2.62E-03 | 0.07 ± 0.01     | 0.33 ± 0.02     | 0.37 ± 0.02 | 0.03 ± 1.78E-03 | 0.04 ± 4.98E-03 | 0.17 ± 0.02     | 0.20 ± 0.02 | 0.73 ± 0.09 | 0.83 ± 0.02 | 1.08 ± 0.02 | 0.78 ± 0.09 | 0.89 ± 0.01 |
| MST (3) | 39      | 0   | 0.59 ± 0.02 | 1.05 ± 0.11 | 0.12 ± 0.02     | 0.23 ± 0.01     | 0.55 ± 0.01     | 0.72 ± 0.01 | 0.20 ± 0.04     | 0.22 ± 0.01     | 0.93 ± 0.04     | 0.69 ± 0.07 | 0.89 ± 0.11 | 1.36 ± 0.10 | 0.57 ± 0.04 | 0.51 ± 0.10 | 0.77 ± 0.01 |
|         |         | 50  | 1.05 ± 0.04 | 1.32 ± 0.09 | 0.09 ± 2.04E-03 | 0.18 ± 0.02     | 0.54 ± 0.02     | 0.68 ± 0.02 | 0.08 ± 3.60E-03 | 0.14 ± 0.02     | 0.51 ± 0.01     | 0.52 ± 0.02 | 0.62 ± 0.08 | 0.99 ± 0.04 | 0.80 ± 0.03 | 0.49 ± 0.07 | 0.79 ± 0.01 |
|         |         | 100 | 1.58 ± 0.09 | 1.53 ± 0.03 | 0.08 ± 4.34E-03 | 0.10 ± 0.02     | 0.50 ± 0.03     | 0.65 ± 0.05 | 0.05 ± 6.73E-04 | 0.07 ± 0.01     | 0.31 ± 0.01     | 0.42 ± 0.02 | 0.76 ± 0.10 | 0.74 ± 0.02 | 1.03 ± 0.07 | 0.79 ± 0.15 | 0.77 ± 0.08 |
|         |         | 150 | 1.98 ± 0.18 | 1.89 ± 0.15 | 0.07 ± 3.73E-03 | 0.07 ± 2.58E-03 | 0.38 ± 0.03     | 0.48 ± 0.01 | 0.03 ± 2.64E-03 | 0.04 ± 1.87E-03 | 0.19 ± 0.02     | 0.25 ± 0.01 | 0.90 ± 0.04 | 0.76 ± 0.05 | 1.05 ± 0.03 | 0.95 ± 0.02 | 0.80 ± 0.07 |
|         |         | 200 | 2.14 ± 0.12 | 1.75 ± 0.13 | 0.06 ± 4.83E-03 | 0.07 ± 4.37E-03 | 0.36 ± 0.10     | 0.41 ± 0.04 | 0.03 ± 1.59E-03 | 0.04 ± 1.32E-03 | 0.17 ± 0.05     | 0.24 ± 0.04 | 0.72 ± 0.05 | 0.74 ± 0.33 | 1.23 ± 0.14 | 0.88 ± 0.05 | 0.89 ± 0.31 |
|         | 319     | 0   | 0.51 ± 0.05 | 0.91 ± 0.09 | 0.10 ± 0.01     | 0.22 ± 0.02     | 0.52 ± 0.02     | 0.73 ± 0.07 | 0.19 ± 0.03     | 0.24 ± 4.14E-03 | 1.03 ± 0.06     | 0.80 ± 0.06 | 0.79 ± 0.10 | 1.29 ± 0.10 | 0.56 ± 0.01 | 0.44 ± 0.05 | 0.72 ± 0.07 |
|         |         | 50  | 1.01 ± 0.05 | 1.47 ± 0.10 | 0.09 ± 0.01     | 0.20 ± 0.01     | 0.51 ± 0.02     | 0.67 ± 0.02 | 0.09 ± 0.01     | 0.14 ± 0.02     | 0.50 ± 0.04     | 0.45 ± 0.03 | 0.64 ± 0.10 | 1.10 ± 0.11 | 0.69 ± 0.02 | 0.44 ± 0.06 | 0.76 ± 0.06 |
|         |         | 100 | 1.50 ± 0.04 | 1.57 ± 0.04 | 0.07 ± 0.01     | 0.11 ± 0.02     | 0.49 ± 0.05     | 0.65 ± 0.02 | 0.05 ± 0.01     | 0.07 ± 0.01     | 0.33 ± 0.04     | 0.42 ± 0.01 | 0.74 ± 0.15 | 0.78 ± 0.13 | 0.95 ± 0.05 | 0.71 ± 0.13 | 0.74 ± 0.09 |
|         |         | 150 | 2.14 ± 0.04 | 1.77 ± 0.14 | 0.06 ± 4.80E-03 | 0.08 ± 0.02     | 0.39 ± 2.64E-03 | 0.46 ± 0.04 | 0.03 ± 2.02E-03 | 0.05 ± 0.01     | 0.18 ± 3.13E-03 | 0.26 ± 0.02 | 0.63 ± 0.11 | 0.71 ± 0.06 | 1.22 ± 0.11 | 0.78 ± 0.20 | 0.86 ± 0.07 |
|         |         | 200 | 1.96 ± 0.08 | 1.84 ± 0.04 | 0.07 ± 0.01     | 0.08 ± 0.01     | 0.36 ± 0.03     | 0.39 ± 0.03 | 0.03 ± 3.10E-03 | 0.04 ± 3.55E-03 | 0.18 ± 0.01     | 0.21 ± 0.02 | 0.80 ± 0.12 | 0.86 ± 0.08 | 1.07 ± 0.05 | 0.86 ± 0.16 | 0.92 ± 0.11 |
|         | 388     | 0   | 0.54 ± 0.13 | 1.03 ± 0.18 | 0.10 ± 4.53E-03 | 0.22 ± 0.02     | 0.53 ± 0.02     | 0.71 ± 0.04 | 0.20 ± 0.04     | 0.22 ± 0.05     | 1.01 ± 0.17     | 0.70 ± 0.13 | 0.93 ± 0.07 | 1.44 ± 0.18 | 0.52 ± 0.04 | 0.49 ± 0.04 | 0.75 ± 0.05 |
|         |         | 50  | 0.95 ± 0.11 | 1.42 ± 0.06 | 0.08 ± 0.01     | 0.18 ± 0.02     | 0.47 ± 0.01     | 0.67 ± 0.06 | 0.08 ± 9.70E-04 | 0.13 ± 0.01     | 0.50 ± 0.06     | 0.47 ± 0.04 | 0.65 ± 0.08 | 1.07 ± 0.21 | 0.67 ± 0.09 | 0.43 ± 0.11 | 0.70 ± 0.08 |
|         |         | 100 | 1.49 ± 0.11 | 1.49 ± 0.14 | 0.08 ± 4.95E-03 | 0.09 ± 0.01     | 0.46 ± 0.04     | 0.63 ± 0.06 | 0.06 ± 0.01     | 0.06 ± 0.01     | 0.31 ± 0.03     | 0.42 ± 0.04 | 0.94 ± 0.13 | 0.72 ± 0.04 | 1.00 ± 0.05 | 0.94 ± 0.18 | 0.72 ± 0.04 |
|         |         | 150 | 1.93 ± 0.15 | 1.76 ± 0.07 | 0.08 ± 2.80E-03 | 0.09 ± 0.01     | 0.41 ± 0.03     | 0.49 ± 0.01 | 0.04 ± 2.27E-03 | 0.05 ± 3.12E-03 | 0.21 ± 0.01     | 0.28 ± 0.01 | 0.83 ± 0.06 | 0.77 ± 0.04 | 1.10 ± 0.08 | 0.92 ± 0.11 | 0.85 ± 0.05 |
|         |         | 200 | 2.07 ± 0.11 | 1.86 ± 0.09 | 0.07 ± 0.01     | 0.07 ± 0.01     | 0.38 ± 0.02     | 0.37 ± 0.02 | 0.03 ± 1.28E-03 | 0.04 ± 0.01     | 0.18 ± 0.02     | 0.20 ± 0.01 | 0.89 ± 0.17 | 0.93 ± 0.09 | 1.11 ± 0.04 | 0.99 ± 0.19 | 1.03 ± 0.07 |
|         | 525     | 0   | 0.56 ± 0.06 | 0.94 ± 0.11 | 0.11 ± 0.01     | 0.23 ± 0.01     | 0.56 ± 0.03     | 0.74 ± 0.04 | 0.20 ± 0.02     | 0.24 ± 0.02     | 0.99 ± 0.07     | 0.79 ± 0.05 | 0.82 ± 0.04 | 1.26 ± 0.12 | 0.60 ± 0.07 | 0.49 ± 0.05 | 0.75 ± 0.01 |
|         |         | 50  | 1.13 ± 0.04 | 1.49 ± 0.06 | 0.07 ± 0.01     | 0.18 ± 0.02     | 0.49 ± 0.05     | 0.66 ± 0.03 | 0.06 ± 0.01     | 0.12 ± 0.02     | 0.43 ± 0.05     | 0.44 ± 0.03 | 0.53 ± 0.06 | 0.98 ± 0.14 | 0.76 ± 0.06 | 0.41 ± 0.05 | 0.74 ± 0.06 |
|         |         | 100 | 1.52 ± 0.03 | 1.57 ± 0.02 | 0.07 ± 3.99E-03 | 0.10 ± 0.02     | 0.46 ± 0.04     | 0.58 ± 0.02 | 0.05 ± 2.10E-03 | 0.06 ± 0.01     | 0.30 ± 0.03     | 0.37 ± 0.01 | 0.74 ± 0.15 | 0.81 ± 0.12 | 0.97 ± 0.03 | 0.72 ± 0.17 | 0.79 ± 0.10 |
|         |         | 150 | 1.89 ± 0.09 | 1.63 ± 0.09 | 0.06 ± 4.82E-03 | 0.09 ± 0.01     | 0.41 ± 0.03     | 0.47 ± 0.03 | 0.03 ± 2.17E-03 | 0.05 ± 4.25E-03 | 0.22 ± 0.01     | 0.29 ± 0.02 | 0.55 ± 0.06 | 0.75 ± 0.08 | 1.16 ± 0.11 | 0.63 ± 0.08 | 0.87 ± 0.11 |
|         |         | 200 | /           | 1.74 ± 0.09 | /               | 0.07 ± 0.01     | /               | 0.36 ± 0.06 | /               | 0.04 ± 0.01     | /               | 0.21 ± 0.03 | /           | /           | /           | /           | /           |
|         | Average | 0   | 0.55 ± 0.03 | 0.98 ± 0.07 | 0.11 ± 0.01     | 0.22 ± 0.01     | 0.54 ± 0.02     | 0.72 ± 0.01 | 0.20 ± 3.92E-03 | 0.23 ± 0.01     | 0.99 ± 0.04     | 0.74 ± 0.06 | 0.86 ± 0.06 | 1.34 ± 0.08 | 0.56 ± 0.03 | 0.48 ± 0.03 | 0.75 ± 0.02 |
|         |         | 50  | 1.04 ± 0.08 | 1.43 ± 0.08 | 0.08 ± 0.01     | 0.19 ± 0.01     | 0.50 ± 0.03     | 0.67 ± 0.01 | 0.08 ± 0.01     | 0.13 ± 0.01     | 0.49 ± 0.04     | 0.47 ± 0.03 | 0.61 ± 0.05 | 1.04 ± 0.06 | 0.73 ± 0.06 | 0.44 ± 0.04 | 0.75 ± 0.04 |
|         |         | 100 | 1.52 ± 0.04 | 1.54 ± 0.04 | 0.08 ± 0.01     | 0.10 ± 0.01     | 0.47 ± 0.02     | 0.63 ± 0.03 | 0.05 ± 4.07E-03 | 0.06 ± 3.74E-03 | 0.31 ± 0.01     | 0.41 ± 0.03 | 0.80 ± 0.10 | 0.77 ± 0.04 | 0.99 ± 0.03 | 0.79 ± 0.11 | 0.76 ± 0.03 |
|         |         | 150 | 1.98 ± 0.11 | 1.76 ± 0.11 | 0.07 ± 0.01     | 0.08 ± 0.01     | 0.40 ± 0.02     | 0.47 ± 0.01 | 0.03 ± 0.01     | 0.05 ± 0.01     | 0.20 ± 0.02     | 0.27 ± 0.02 | 0.73 ± 0.17 | 0.75 ± 0.03 | 1.13 ± 0.07 | 0.82 ± 0.14 | 0.84 ± 0.03 |
|         |         | 200 | 2.06 ± 0.09 | 1.80 ± 0.06 | 0.07 ± 0.01     | 0.07 ± 0.01     | 0.37 ± 0.01     | 0.38 ± 0.02 | 0.03 ± 3.53E-03 | 0.04 ± 1.85E-03 | 0.18 ± 0.01     | 0.21 ± 0.02 | 0.80 ± 0.08 | 0.84 ± 0.09 | 1.14 ± 0.09 | 0.91 ± 0.07 | 0.95 ± 0.07 |
| ST (4)  | 130     | 0   | 0.58 ± 0.05 | 1.04 ± 0.08 | 0.11 ± 4.33E-03 | 0.24 ± 0.03     | 0.55 ± 0.04     | 0.69 ± 0.03 | 0.19 ± 0.02     | 0.23 ± 0.01     | 0.94 ± 0.11     | 0.67 ± 0.02 | 0.81 ± 0.06 | 1.41 ± 0.21 | 0.57 ± 0.07 | 0.45 ± 0.04 | 0.79 ± 0.03 |
|         |         | 50  | 1.08 ± 0.06 | 1.34 ± 0.03 | 0.10 ± 3.68E-03 | 0.20 ± 0.01     | 0.57 ± 0.04     | 0.68 ± 0.04 | 0.09 ± 2.96E-03 | 0.15 ± 0.01     | 0.53 ± 0.07     | 0.51 ± 0.04 | 0.59 ± 0.05 | 1.04 ± 0.13 | 0.81 ± 0.05 | 0.48 ± 0.01 | 0.84 ± 0.05 |
|         |         | 100 | 1.41 ± 0.08 | 1.49 ± 0.07 | 0.06 ± 4.22E-03 | 0.10 ± 0.03     | 0.46 ± 0.02     | 0.65 ± 0.11 | 0.04 ± 1.72E-03 | 0.07 ± 0.01     | 0.33 ± 0.02     | 0.44 ± 0.09 | 0.65 ± 0.11 | 0.77 ± 0.18 | 0.95 ± 0.09 | 0.62 ± 0.13 | 0.72 ± 0.11 |
|         |         | 150 | 1.99 ± 0.06 | 1.64 ± 0.09 | 0.06 ± 0.01     | 0.08 ± 0.01     | 0.42 ± 0.02     | 0.48 ± 0.04 | 0.03 ± 3.73E-03 | 0.05 ± 0.01     | 0.21 ± 3.50E-03 | 0.30 ± 0.04 | 0.67 ± 0.10 | 0.72 ± 0.08 | 1.22 ± 0.10 | 0.81 ± 0.16 | 0.87 ± 0.03 |
|         |         | 200 | 2.09 ± 0.08 | 1.67 ± 0.10 | 0.07 ± 2.36E-03 | 0.08 ± 0.01     | 0.35 ± 0.02     | 0.42 ± 0.01 | 0.03 ± 1.13E-03 | 0.05 ± 0.01     | 0.17 ± 2.82E-03 | 0.25 ± 0.02 | 0.74 ± 0.09 | 0.68 ± 0.07 | 1.25 ± 0.04 | 0.92 ± 0.09 | 0.85 ± 0.07 |
|         | 344     | 0   | 0.55 ± 0.03 | 1.11 ± 0.09 | 0.13 ± 0.01     | 0.25 ± 0.02     | 0.56 ± 0.02     | 0.72 ± 0.01 | 0.23 ± 0.01     | 0.22 ± 3.27E-03 | 1.02 ± 0.07     | 0.65 ± 0.05 | 1.06 ± 0.07 | 1.57 ± 0.07 | 0.50 ± 0.03 | 0.52 ± 0.04 | 0.78 ± 0.03 |
|         |         | 50  | 0.99 ± 0.04 | 1.41 ± 0.04 | 0.10 ± 2.36E-03 | 0.19 ± 0.03     |                 |             |                 |                 |                 |             |             |             |             |             |             |

Supplementary Materials S2 continued

|         |     |             |             |             |                 |                 |                 |                 |                 |                 |                 |             |             |             |             |             |             |
|---------|-----|-------------|-------------|-------------|-----------------|-----------------|-----------------|-----------------|-----------------|-----------------|-----------------|-------------|-------------|-------------|-------------|-------------|-------------|
|         |     | 100         | 1.49 ± 0.07 | 1.53 ± 0.03 | 0.07 ± 0.01     | 0.09 ± 0.01     | 0.46 ± 0.02     | 0.65 ± 0.02     | 0.05 ± 2.02E-03 | 0.06 ± 0.01     | 0.31 ± 0.02     | 0.42 ± 0.02 | 0.77 ± 0.10 | 0.73 ± 0.06 | 0.98 ± 0.03 | 0.75 ± 0.12 | 0.71 ± 0.06 |
|         |     | 150         | 1.92 ± 0.16 | 1.66 ± 0.06 | 0.07 ± 0.01     | 0.08 ± 0.01     | 0.41 ± 0.03     | 0.49 ± 0.02     | 0.03 ± 3.62E-03 | 0.05 ± 0.01     | 0.22 ± 0.02     | 0.30 ± 0.01 | 0.70 ± 0.08 | 0.73 ± 0.04 | 1.16 ± 0.07 | 0.81 ± 0.12 | 0.84 ± 0.04 |
|         |     | 200         | 1.93 ± 0.12 | 1.65 ± 0.12 | 0.06 ± 0.01     | 0.08 ± 1.98E-03 | 0.36 ± 0.01     | 0.40 ± 0.02     | 0.03 ± 1.65E-03 | 0.05 ± 3.70E-03 | 0.19 ± 0.02     | 0.24 ± 0.02 | 0.68 ± 0.07 | 0.79 ± 0.08 | 1.18 ± 0.07 | 0.80 ± 0.09 | 0.93 ± 0.08 |
| HST (5) | 137 | 0           | 0.57 ± 0.01 | 1.08 ± 0.09 | 0.16 ± 2.15E-03 | 0.23 ± 0.02     | 0.62 ± 0.02     | 0.74 ± 0.04     | 0.29 ± 0.01     | 0.22 ± 0.02     | 1.07 ± 0.05     | 0.70 ± 0.07 | 1.31 ± 0.11 | 1.55 ± 0.09 | 0.54 ± 0.04 | 0.70 ± 0.05 | 0.83 ± 0.03 |
|         |     | 50          | 1.05 ± 0.05 | 1.23 ± 0.05 | 0.12 ± 0.01     | 0.20 ± 0.03     | 0.58 ± 0.02     | 0.72 ± 0.07     | 0.11 ± 0.01     | 0.17 ± 0.02     | 0.56 ± 0.01     | 0.59 ± 0.08 | 0.67 ± 0.07 | 0.96 ± 0.11 | 0.85 ± 0.07 | 0.58 ± 0.10 | 0.81 ± 0.06 |
|         |     | 100         | 1.49 ± 0.01 | 1.29 ± 0.11 | 0.10 ± 0.01     | 0.13 ± 0.04     | 0.55 ± 0.04     | 0.57 ± 0.11     | 0.06 ± 4.28E-03 | 0.10 ± 0.02     | 0.37 ± 0.03     | 0.44 ± 0.05 | 0.66 ± 0.11 | 0.85 ± 0.08 | 1.15 ± 0.09 | 0.76 ± 0.15 | 0.98 ± 0.13 |
|         |     | 150         | 1.90 ± 0.03 | 1.34 ± 0.06 | 0.09 ± 0.01     | 0.09 ± 0.01     | 0.46 ± 0.04     | 0.46 ± 0.03     | 0.05 ± 0.01     | 0.07 ± 0.01     | 0.24 ± 0.02     | 0.34 ± 0.04 | 0.74 ± 0.12 | 0.71 ± 0.11 | 1.42 ± 0.07 | 1.05 ± 0.19 | 1.01 ± 0.12 |
|         |     | 200         | 1.99 ± 0.05 | 1.43 ± 0.05 | 0.09 ± 0.01     | 0.07 ± 0.01     | 0.39 ± 0.03     | 0.42 ± 0.01     | 0.05 ± 0.01     | 0.05 ± 0.01     | 0.19 ± 0.01     | 0.29 ± 0.02 | 0.97 ± 0.22 | 0.67 ± 0.01 | 1.39 ± 0.08 | 1.34 ± 0.27 | 0.93 ± 0.06 |
|         | 370 | 0           | 0.57 ± 0.03 | 0.93 ± 0.08 | 0.13 ± 0.01     | 0.24 ± 0.01     | 0.58 ± 1.52E-03 | 0.70 ± 0.02     | 0.22 ± 0.02     | 0.26 ± 0.02     | 1.02 ± 0.05     | 0.75 ± 0.08 | 0.84 ± 0.04 | 1.37 ± 0.16 | 0.62 ± 0.05 | 0.52 ± 0.04 | 0.84 ± 0.03 |
|         |     | 50          | 0.99 ± 0.03 | 1.12 ± 0.03 | 0.09 ± 4.22E-03 | 0.17 ± 0.01     | 0.56 ± 0.03     | 0.63 ± 0.04     | 0.09 ± 2.53E-03 | 0.15 ± 0.01     | 0.57 ± 0.04     | 0.57 ± 0.02 | 0.57 ± 0.04 | 1.00 ± 0.08 | 0.89 ± 0.04 | 0.51 ± 0.06 | 0.89 ± 0.08 |
|         |     | 100         | 1.49 ± 0.05 | 1.24 ± 0.17 | 0.08 ± 0.01     | 0.10 ± 0.01     | 0.49 ± 0.01     | 0.59 ± 0.02     | 0.05 ± 4.39E-03 | 0.08 ± 0.02     | 0.33 ± 0.02     | 0.48 ± 0.08 | 0.68 ± 0.17 | 0.69 ± 0.08 | 1.22 ± 0.16 | 0.81 ± 0.11 | 0.83 ± 0.02 |
|         |     | 150         | 1.95 ± 0.10 | 1.30 ± 0.08 | 0.08 ± 3.87E-03 | 0.08 ± 1.88E-03 | 0.43 ± 0.05     | 0.46 ± 0.02     | 0.04 ± 4.04E-03 | 0.06 ± 2.81E-03 | 0.22 ± 0.03     | 0.36 ± 0.02 | 0.67 ± 0.05 | 0.62 ± 0.11 | 1.51 ± 0.06 | 1.01 ± 0.07 | 0.93 ± 0.13 |
|         |     | 200         | 2.09 ± 0.07 | 1.41 ± 0.11 | 0.07 ± 0.01     | 0.06 ± 0.01     | 0.38 ± 0.01     | 0.36 ± 0.03     | 0.03 ± 2.48E-03 | 0.05 ± 0.01     | 0.18 ± 3.15E-03 | 0.26 ± 0.03 | 0.74 ± 0.06 | 0.71 ± 0.08 | 1.48 ± 0.11 | 1.09 ± 0.04 | 1.05 ± 0.11 |
|         | 460 | 0           | 0.63 ± 0.05 | 0.85 ± 0.14 | 0.12 ± 0.03     | 0.23 ± 0.01     | 0.55 ± 0.02     | 0.72 ± 0.05     | 0.19 ± 0.04     | 0.27 ± 0.03     | 0.88 ± 0.08     | 0.85 ± 0.09 | 0.72 ± 0.24 | 1.04 ± 0.11 | 0.75 ± 0.10 | 0.53 ± 0.10 | 0.77 ± 0.04 |
|         |     | 50          | 1.17 ± 0.03 | 1.24 ± 0.06 | 0.07 ± 0.01     | 0.18 ± 0.01     | 0.47 ± 0.04     | 0.65 ± 0.04     | 0.06 ± 4.61E-03 | 0.15 ± 0.02     | 0.40 ± 0.03     | 0.52 ± 0.03 | 0.42 ± 0.04 | 0.78 ± 0.09 | 0.95 ± 0.07 | 0.40 ± 0.03 | 0.74 ± 0.12 |
|         |     | 100         | 1.55 ± 0.03 | 1.46 ± 0.08 | 0.08 ± 0.01     | 0.11 ± 0.01     | 0.49 ± 0.05     | 0.64 ± 0.04     | 0.05 ± 0.01     | 0.07 ± 0.01     | 0.32 ± 0.03     | 0.44 ± 0.04 | 0.66 ± 0.06 | 0.72 ± 0.10 | 1.06 ± 0.08 | 0.70 ± 0.03 | 0.76 ± 0.06 |
|         |     | 150         | 1.86 ± 0.06 | 1.59 ± 0.07 | 0.07 ± 4.18E-03 | 0.10 ± 0.01     | 0.38 ± 0.04     | 0.49 ± 0.04     | 0.04 ± 1.60E-03 | 0.06 ± 0.01     | 0.21 ± 0.02     | 0.31 ± 0.03 | 0.62 ± 0.13 | 0.68 ± 0.07 | 1.17 ± 0.05 | 0.73 ± 0.12 | 0.79 ± 0.07 |
|         |     | 200         | 1.93 ± 0.16 | 1.61 ± 0.08 | 0.06 ± 0.01     | 0.08 ± 0.01     | 0.35 ± 0.04     | 0.38 ± 0.04     | 0.03 ± 2.31E-03 | 0.05 ± 2.75E-03 | 0.18 ± 0.01     | 0.23 ± 0.03 | 0.66 ± 0.08 | 0.77 ± 0.11 | 1.20 ± 0.14 | 0.80 ± 0.18 | 0.92 ± 0.03 |
|         | 475 | 0           | 0.59 ± 0.05 | 1.10 ± 0.05 | 0.12 ± 4.84E-03 | 0.24 ± 0.01     | 0.58 ± 0.05     | 0.72 ± 0.02     | 0.20 ± 0.01     | 0.22 ± 2.35E-03 | 0.98 ± 0.05     | 0.66 ± 0.03 | 0.90 ± 0.07 | 1.49 ± 0.10 | 0.54 ± 0.03 | 0.48 ± 0.03 | 0.80 ± 0.09 |
|         |     | 50          | 1.13 ± 0.06 | 1.32 ± 0.09 | 0.09 ± 3.06E-03 | 0.19 ± 0.01     | 0.49 ± 0.02     | 0.65 ± 0.03     | 0.08 ± 1.88E-03 | 0.14 ± 1.16E-03 | 0.44 ± 0.03     | 0.49 ± 0.01 | 0.56 ± 0.01 | 0.88 ± 0.08 | 0.86 ± 0.10 | 0.49 ± 0.04 | 0.76 ± 0.04 |
|         |     | 100         | 1.54 ± 0.10 | 1.48 ± 0.02 | 0.09 ± 0.01     | 0.11 ± 2.81E-03 | 0.50 ± 0.05     | 0.63 ± 0.06     | 0.06 ± 0.01     | 0.07 ± 2.96E-03 | 0.33 ± 0.05     | 0.43 ± 0.04 | 0.75 ± 0.10 | 0.77 ± 0.11 | 1.04 ± 0.05 | 0.78 ± 0.07 | 0.80 ± 0.08 |
|         |     | 150         | 2.05 ± 0.19 | 1.38 ± 0.18 | 0.08 ± 4.61E-03 | 0.07 ± 2.79E-03 | 0.43 ± 0.05     | 0.51 ± 0.03     | 0.04 ± 2.42E-03 | 0.05 ± 0.01     | 0.21 ± 0.02     | 0.37 ± 0.04 | 0.73 ± 0.13 | 0.57 ± 0.11 | 1.50 ± 0.22 | 1.08 ± 0.06 | 0.84 ± 0.10 |
|         |     | 200         | 1.91 ± 0.01 | 1.58 ± 0.08 | 0.07 ± 4.64E-03 | 0.07 ± 4.62E-03 | 0.35 ± 0.02     | 0.37 ± 0.03     | 0.03 ± 2.63E-03 | 0.04 ± 3.70E-03 | 0.18 ± 0.01     | 0.23 ± 0.03 | 0.81 ± 0.07 | 0.80 ± 0.10 | 1.21 ± 0.06 | 0.97 ± 0.10 | 0.96 ± 0.11 |
| Average | 0   | 0.59 ± 0.02 | 0.99 ± 0.12 | 0.13 ± 0.02 | 0.24 ± 0.01     | 0.58 ± 0.03     | 0.72 ± 0.02     | 0.22 ± 0.04     | 0.24 ± 0.03     | 0.99 ± 0.08     | 0.74 ± 0.08     | 0.95 ± 0.25 | 1.36 ± 0.23 | 0.61 ± 0.10 | 0.56 ± 0.10 | 0.81 ± 0.03 |             |
|         | 50  | 1.09 ± 0.08 | 1.23 ± 0.08 | 0.09 ± 0.02 | 0.19 ± 0.01     | 0.53 ± 0.05     | 0.66 ± 0.04     | 0.09 ± 0.02     | 0.15 ± 0.01     | 0.49 ± 0.08     | 0.54 ± 0.04     | 0.56 ± 0.10 | 0.91 ± 0.10 | 0.89 ± 0.04 | 0.49 ± 0.07 | 0.80 ± 0.07 |             |
|         | 100 | 1.52 ± 0.03 | 1.37 ± 0.12 | 0.08 ± 0.01 | 0.11 ± 0.01     | 0.51 ± 0.03     | 0.61 ± 0.03     | 0.06 ± 0.01     | 0.08 ± 0.01     | 0.33 ± 0.02     | 0.45 ± 0.03     | 0.69 ± 0.05 | 0.75 ± 0.07 | 1.12 ± 0.08 | 0.76 ± 0.05 | 0.84 ± 0.09 |             |
|         | 150 | 1.94 ± 0.08 | 1.40 ± 0.13 | 0.08 ± 0.01 | 0.08 ± 0.01     | 0.43 ± 0.03     | 0.48 ± 0.02     | 0.04 ± 4.54E-03 | 0.06 ± 4.84E-03 | 0.22 ± 0.02     | 0.35 ± 0.03     | 0.69 ± 0.05 | 0.64 ± 0.06 | 1.40 ± 0.15 | 0.97 ± 0.16 | 0.89 ± 0.10 |             |
|         | 200 | 1.98 ± 0.08 | 1.51 ± 0.10 | 0.07 ± 0.01 | 0.07 ± 0.01     | 0.37 ± 0.02     | 0.38 ± 0.02     | 0.04 ± 0.01     | 0.05 ± 2.64E-03 | 0.19 ± 0.01     | 0.25 ± 0.03     | 0.79 ± 0.13 | 0.74 ± 0.06 | 1.32 ± 0.14 | 1.05 ± 0.23 | 0.97 ± 0.06 |             |

The data is the average calculated by the formula, presented as Mean ± SD, n = 4.
